# Supplementary material
Source: PubMed Central journal article supplement (PMC6960447)
Supplement: EMBJ-39-e102924-s002.pdf [file EMBJ-39-e102924-s002.pdf]

**Table EV1: Description of the consensus sequences of the HOR arrays used as reference.**

| <b>HOR Array ID</b> | <b>Length (bp)</b> | <b>Locus</b>     | <b>Chr</b> | <b>Genbank Accession</b>      | <b>Reference</b>         |
|---------------------|--------------------|------------------|------------|-------------------------------|--------------------------|
| cen1_1              | 1019               | D1Z7/D5Z2/D19Z3  | 1,5,19     |                               |                          |
| cen1_2              | 1866               | D1Z5             | 1          | pSD1-1                        | Willard and Waye (1978b) |
| cen1_3              | 1866               | N/A              | 1          | N/A                           | N/A                      |
| cen1_4              | 1530               | N/A              | 1          | N/A                           | N/A                      |
| cen1_5              | 1530               | N/A              | 1          | N/A                           | N/A                      |
| cen2                | 1360               | D2Z1             | 2          | M81229                        | Haaf and Willard (1992)  |
| cen3_1              | 2891               | D3Z1             | 3          | Z12006                        | Alexandrov et al (1993b) |
| cen3_2              | 1699               | N/A              | 3          | N/A                           | N/A                      |
| cen3_3              | 340                | N/A              | 3          | N/A                           | N/A                      |
| cen4                | 3230               | D4Z1 (pYAM11-39) | 4          | Z12011-2, p4n1/4, pG-XbaI/340 | Mashkova et al (1994)    |
| cen5_1              | 2214               | N/A              | 5          | AJ295045; pGA16               | Hulsebos et al (1988)    |
| cen5_2              | 2558               | N/A              | 5          | N/A                           | N/A                      |
| cen5_3              | 2719               | N/A              | 5          | N/A                           | N/A                      |
| cen5_4              | 5456               | N/A              | 5          | N/A                           | N/A                      |
| cen5_5              | 2736               | N/A              | 5          | N/A                           | N/A                      |
| cen5_6              | 4089               | N/A              | 5          | N/A                           | N/A                      |

|                |      |                                |             |                |                                                                       |
|----------------|------|--------------------------------|-------------|----------------|-----------------------------------------------------------------------|
| <b>cen6</b>    | 3057 | D6Z1                           | 6           | AB005791       | Suigimoto et al. (1997);Jabs et al (1984);<br>Jabs and Perisco (1987) |
| <b>cen7_1</b>  | 1022 | D7Z1                           | 7           | M16087, M16101 | Waye et al (1987)                                                     |
| <b>cen7_2</b>  | 2734 | D7Z2                           | 7           | M16037         | Waye et al (1987)                                                     |
| <b>cen8</b>    | 1868 | D8Z2                           | 8           | M64779         | Ge et al. (1992)                                                      |
| <b>cen9</b>    | 680  | D9Z4                           | 9           | M64320         | Rocchi et al. (1991)                                                  |
| <b>cen10_1</b> | 1019 | D10Z1                          | 10          |                | Looijenga et al (1992)                                                |
| <b>cen10_2</b> | 3058 | N/A                            | 10          | N/A            | N/A                                                                   |
| <b>cen10_3</b> | 2375 | N/A                            | 10          | N/A            | N/A                                                                   |
| <b>cen10_4</b> | 2736 | N/A                            | 10          | N/A            | N/A                                                                   |
| <b>cen11_1</b> | 850  | D11Z1                          | 11          | M21452         | Waye et al (1987)                                                     |
| <b>cen11_2</b> | 2047 | N/A                            | 11          | N/A            | N/A                                                                   |
| <b>cen11_3</b> | 2736 | N/A                            | 11          | N/A            | N/A                                                                   |
| <b>cen12_1</b> | 1359 | D12Z3                          | 12          | M93287         | Looijenga et al (1992)                                                |
| <b>cen12_2</b> | 3056 | N/A                            | 12          | N/A            | N/A                                                                   |
| <b>cen13_1</b> | 1870 | D13Z1/D21Z1<br>(alphaRI,L1.26) | 13,21       | D29750         |                                                                       |
| <b>cen13_2</b> | 3914 | D13Z4/D14Z6/D21Z5<br>(pTRA-2)  | 13,14,21    | X55367         |                                                                       |
| <b>cen13_3</b> | 1367 | N/A                            | 13,14,21    | N/A            | N/A                                                                   |
| <b>cen13_4</b> | 5642 | N/A                            | 13,14,21,22 | N/A            | N/A                                                                   |
| <b>cen13_5</b> | 2904 | N/A                            | 13,14,21    | N/A            | N/A                                                                   |

|         |       |                               |          |               |                         |
|---------|-------|-------------------------------|----------|---------------|-------------------------|
| cen14   | 3758  | D13Z6/D14Z8/D21Z7<br>(pTRA-7) | 13,14,21 | X55369        |                         |
| cen15_1 | 2557  | D15Z3 (pTRA-20)               | 15       | AF237720      |                         |
| cen15_2 | 3415  | D15Z4 (pTRA-25)               | 15       | N/A           | Choo et al (1990)       |
| cen15_3 | 4264  | N/A                           | 15       | N/A           | N/A                     |
| cen16_1 | 1699  | D16Z2                         | 16       | M58446        | Greig et al (1989)      |
| cen16_2 | 1702  | N/A                           | 16       |               |                         |
| cen17_1 | 2716  | D17Z1                         | 17       | M13882; P17H8 | Waye and Willard (1986) |
| cen17_2 | 2379  | D17Z1B                        | 17       |               | Rudd and Willard (2004) |
| cen17_3 | 2382  | N/A                           | 17       | N/A           | N/A                     |
| cen18_1 | 2035  | D18Z1 (pYAM9-60)              | 18       | M65181        | Alexandrov et al (1991) |
| cen18_2 | 1701  | D18Z2 (pYAM4-22)              | 18       | M38466        | Alexandrov et al (1988) |
| cen18_3 | 1872  | N/A                           | 18       | N/A           | N/A                     |
| cen18_4 | 11225 | N/A                           | 18       | N/A           | N/A                     |
| cen18_5 | 3403  | N/A                           | 18       | N/A           | N/A                     |
| cen18_6 | 3403  | N/A                           | 18       | N/A           | N/A                     |
| cen19   | 2895  | N/A                           | 19       | N/A           | N/A                     |
| cen20_1 | 2719  | D20Z2 (pZ20R)                 | 20       | X58269        | Baldini et al (1992)    |
| cen20_2 | 1360  | N/A                           | 20       | N/A           | N/A                     |
| cen20_3 | 1872  | N/A                           | 20       | N/A           | N/A                     |
| cen20_4 | 1368  | N/A                           | 20       | N/A           | N/A                     |
| cen20_5 | 1878  | N/A                           | 20       | N/A           | N/A                     |

|                |      |                             |       |               |                              |
|----------------|------|-----------------------------|-------|---------------|------------------------------|
| <b>cen20_6</b> | 3246 | N/A                         | 20    | N/A           | N/A                          |
| <b>cen22_1</b> | 1364 | alpha-T(1360) 14-204 III    | 14,22 | M22279,M22295 | Jorgensen,A.L. et al. (1988) |
| <b>cen22_2</b> | 2737 | D13Z5/D14Z7/D21Z6 (pTR9-H2) | 22    | N/A           | Vissel et al (1992)          |
| <b>cen22_3</b> | 3425 | N/A                         | 14,22 | N/A           | N/A                          |
| <b>cen22_4</b> | 3425 | N/A                         | 14,22 | N/A           | N/A                          |
| <b>cen22_5</b> | 2054 | D22Z2 (alpha III)           | 22    | M28299        | McDermid et al (1986)        |
| <b>cenX</b>    | 2057 | DXZ1                        | X     | X02418        | Waye and Willard (1985)      |
| <b>cenY</b>    | 5785 | DYZ3                        | Y     | M29724        | Tyler-Smith and Brown (1987) |
