# Supplementary material
Source: PubMed Central journal article supplement (PMC6960447)
Supplement: EMBJ-39-e102924-s005.pdf [file EMBJ-39-e102924-s005.pdf]

**Table EV4. FISH probes list.** For each probe, the supplier, labelling, denaturation and washing conditions are specified.

| <b>Locus</b>                  | <b>Sequence/supplier</b>                     | <b>Denaturation (T°C, time)</b> | <b>Washing (T°C,time)</b> |
|-------------------------------|----------------------------------------------|---------------------------------|---------------------------|
| Centromere 1                  | Metasystems probes                           | 75 °C, 2 min                    | 72 °C, 2 min              |
| Centromere 2                  | Metasystems probes                           | 75 °C, 2 min                    | 72 °C, 2 min              |
| Centromere 3                  | Metasystems probes                           | 75 °C, 2 min                    | 72 °C, 2 min              |
| Centromere 4                  | Metasystems probes                           | 75 °C, 2 min                    | 72 °C, 2 min              |
| Centromere 6                  | Metasystems probes                           | 75 °C, 2 min                    | 72 °C, 2 min              |
| Centromere 7                  | Metasystems probes                           | 75 °C, 2 min                    | 72 °C, 2 min              |
| Centromere 8                  | Metasystems probes                           | 75 °C, 2 min                    | 72 °C, 2 min              |
| Centromere 9                  | Metasystems probes                           | 75 °C, 2 min                    | 72 °C, 2 min              |
| Centromere 10                 | Metasystems probes                           | 75 °C, 2 min                    | 72 °C, 2 min              |
| Centromere 11                 | Metasystems probes                           | 75 °C, 2 min                    | 72 °C, 2 min              |
| Centromere 12                 | Metasystems probes                           | 75 °C, 2 min                    | 72 °C, 2 min              |
| Centromere 15                 | Metasystems probes                           | 75 °C, 2 min                    | 72 °C, 2 min              |
| Centromere 16                 | Metasystems probes                           | 75 °C, 2 min                    | 72 °C, 2 min              |
| Centromere 17                 | Metasystems probes                           | 75 °C, 2 min                    | 72 °C, 2 min              |
| Centromere 18                 | Metasystems probes                           | 75 °C, 2 min                    | 72 °C, 2 min              |
| Centromere 19                 | Metasystems probes                           | 75 °C, 2 min                    | 72 °C, 2 min              |
| Centromere 20                 | Metasystems probes                           | 75 °C, 2 min                    | 72 °C, 2 min              |
| Centromere X                  | Metasystems probes                           | 75 °C, 2 min                    | 72 °C, 2 min              |
| Centromere Y                  | Metasystems probes                           | 75 °C, 2 min                    | 72 °C, 2 min              |
| Chromosome paint 5            | Metasystems probes                           | 75 °C, 2 min                    | 72 °C, 2 min              |
| Chromosome paint 19           | Metasystems probes                           | 75 °C, 2 min                    | 72 °C, 2 min              |
| Chromosome paint X            | Metasystems probes                           | 75 °C, 2 min                    | 72 °C, 2 min              |
| 5q31/5p15                     | Metasystems probes                           | 75 °C, 2 min                    | 72 °C, 2 min              |
| Centromere 16                 | AmpliTech                                    | 75 °C, 2 min                    | 72 °C, 2 min              |
| CENP-B DNA binding site       | PNA bio                                      | 75 °C, 2 min                    | 72 °C, 2 min              |
| Centromere 1/5/16/19 (aR34TG) | <sup>5</sup> TgAaCgAtCcTtTaCaCa <sup>3</sup> | 85 °C, 3 min                    | 65 °C, 5 min              |
