# Supplementary material
Source: PubMed Central journal article supplement (PMC6960447)
Supplement: EMBJ-39-e102924-s009.pdf [file EMBJ-39-e102924-s009.pdf]

# Dataset EV1

## TABLE OF CONTENTS

|                                                 |    |
|-------------------------------------------------|----|
| 1 Image stream                                  |    |
| 1.1 Analysis of NT and 48h_IAA data.....        | 1  |
| ▪ 1.1.1 Model                                   |    |
| ▪ 1.1.2 Results                                 |    |
| 1.2 Analysis of 48h_IAA data only.....          | 8  |
| ▪ 1.2.1 Model                                   |    |
| ▪ 1.2.2 Results                                 |    |
| 1.3 Analysis of NT data only.....               | 13 |
| ▪ 1.3.1 Model                                   |    |
| ▪ 1.3.2 Results                                 |    |
| 1.4 Gains and losses pooled.....                | 18 |
| ▪ 1.4.1 Pooled data 48h_IAA                     |    |
| ▪ 1.4.2 Pooled data NT                          |    |
| 2 Single cell sequencing                        |    |
| 2.1 48h_IAA.....                                | 25 |
| ▪ 2.1.1 Model on missegregated chromosomes only |    |
| ▪ 2.1.2 Model on all chromosomes                |    |
| ▪ 2.1.3 Test against mean value.                |    |
| 2.2 NT.....                                     | 32 |
| ▪ 2.2.1 Model on missegregated chromosomes only |    |
| ▪ 2.2.2 Model on all chromosomes                |    |
| ▪ 2.2.3 Test against mean value.                |    |
| 3 FISH data                                     |    |
| 3.1 Analysis of NT and 48h_IAA data.....        | 39 |
| ▪ 3.1.1 Model                                   |    |
| ▪ 3.1.2 Results                                 |    |
| 3.2 Analysis of 48h_IAA data only.....          | 45 |
| ▪ 3.2.1 Model                                   |    |
| ▪ 3.2.2 Results                                 |    |
| 3.3 Analysis of NT data only.....               | 49 |
| ▪ 3.3.1 Model                                   |    |
| ▪ 3.3.2 Results                                 |    |
| 3.4 Pooled data.....                            | 53 |
| ▪ 3.4.1 Model on all data.                      |    |
| ▪ 3.4.2 Pooled 48h_IAA                          |    |
| ▪ 3.4.3 Pooled NT                               |    |

# Additional Dataset 1

## 1 Image stream

### 1.1 Analysis of NT and 48h\_IAA data

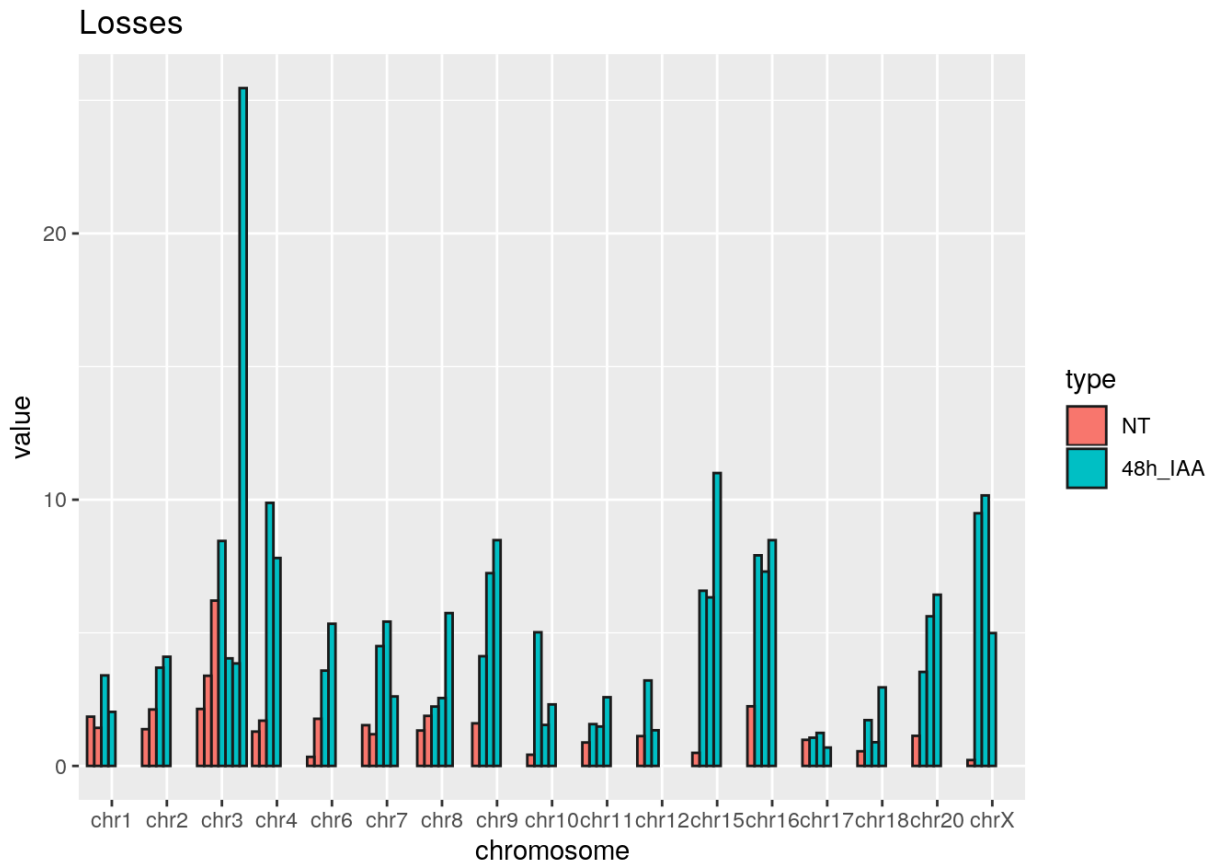

## Gains

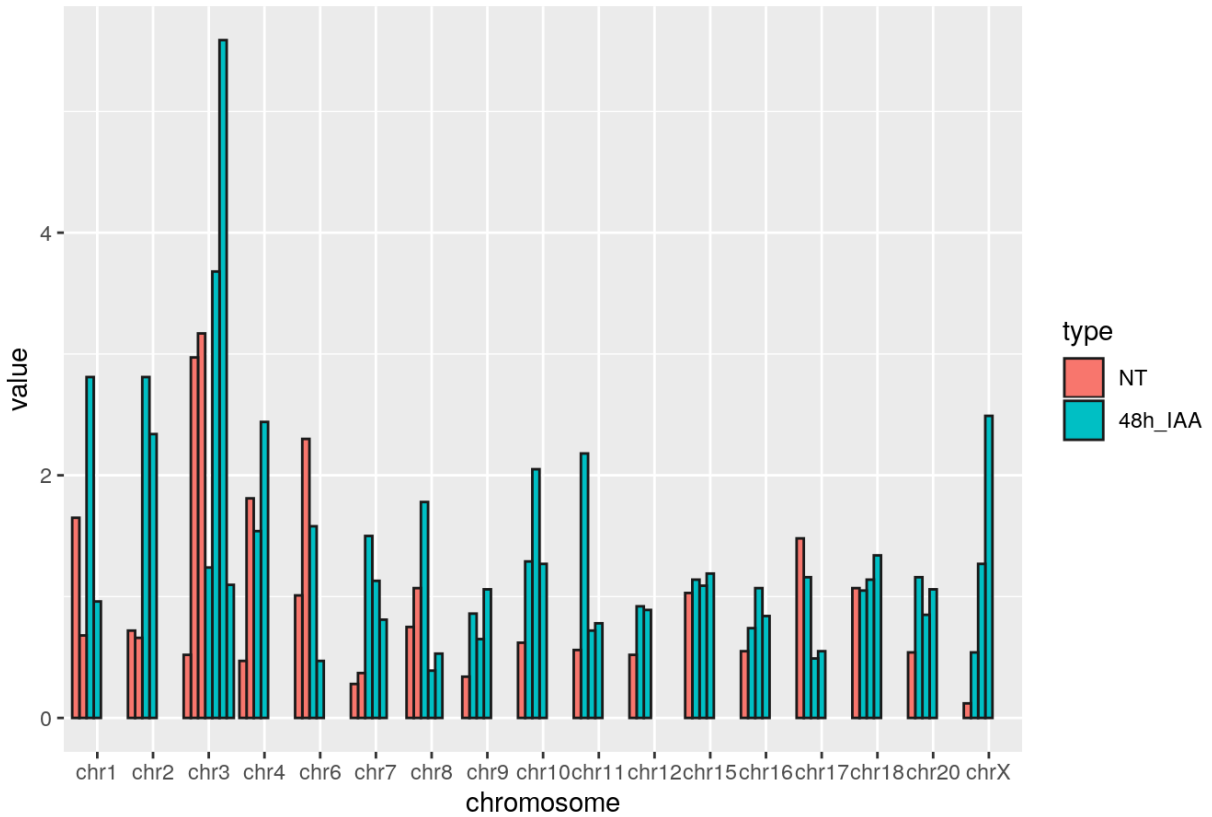

### 1.1.1 Model

A generalized linear model is fitted between gains or losses fractions according to chromosomes and type (control or 48h\_ IAA) with a binomial family.

### 1.1.2 Results

#### 1.1.2.1 Losses

##### 1.1.2.1.1 Estimated proportions for each chromosome

The following table gives the estimated probability for each chromosome with standard error and confidence interval at 95%.

| type     | chromosome | prob      | SE        | lower     | upper     |
|----------|------------|-----------|-----------|-----------|-----------|
| NT       | chr1       | 0.0176471 | 0.0016830 | 0.0146340 | 0.0212671 |
| 48h_ IAA | chr1       | 0.0300561 | 0.0013954 | 0.0274385 | 0.0329150 |
| NT       | chr2       | 0.0162423 | 0.0018727 | 0.0129519 | 0.0203514 |
| 48h_ IAA | chr2       | 0.0391582 | 0.0018278 | 0.0357289 | 0.0429021 |
| NT       | chr3       | 0.0487218 | 0.0009937 | 0.0468107 | 0.0507067 |
| 48h_ IAA | chr3       | 0.1338195 | 0.0014837 | 0.1309381 | 0.1367544 |
| NT       | chr4       | 0.0137383 | 0.0012778 | 0.0114463 | 0.0164815 |
| 48h_ IAA | chr4       | 0.0908059 | 0.0055890 | 0.0804301 | 0.1023712 |

| <b>type</b> | <b>chromosome</b> | <b>prob</b> | <b>SE</b> | <b>lower</b> | <b>upper</b> |
|-------------|-------------------|-------------|-----------|--------------|--------------|
| NT          | chr6              | 0.0065004   | 0.0010652 | 0.0047133    | 0.0089589    |
| 48h_IAA     | chr6              | 0.0505636   | 0.0022488 | 0.0463335    | 0.0551575    |
| NT          | chr7              | 0.0148785   | 0.0013053 | 0.0125255    | 0.0176657    |
| 48h_IAA     | chr7              | 0.0369906   | 0.0015753 | 0.0340240    | 0.0402051    |
| NT          | chr8              | 0.0141151   | 0.0015869 | 0.0113200    | 0.0175881    |
| 48h_IAA     | chr8              | 0.0299076   | 0.0022932 | 0.0257258    | 0.0347448    |
| NT          | chr9              | 0.0160355   | 0.0023202 | 0.0120687    | 0.0212780    |
| 48h_IAA     | chr9              | 0.0715056   | 0.0023468 | 0.0670403    | 0.0762440    |
| NT          | chr10             | 0.0042151   | 0.0008412 | 0.0028498    | 0.0062306    |
| 48h_IAA     | chr10             | 0.0286260   | 0.0032578 | 0.0228872    | 0.0357510    |
| NT          | chr11             | 0.0088394   | 0.0011976 | 0.0067761    | 0.0115238    |
| 48h_IAA     | chr11             | 0.0171429   | 0.0014964 | 0.0144437    | 0.0203360    |
| NT          | chr12             | 0.0111883   | 0.0014609 | 0.0086591    | 0.0144454    |
| 48h_IAA     | chr12             | 0.0273141   | 0.0031747 | 0.0217349    | 0.0342753    |
| NT          | chr15             | 0.0048988   | 0.0007927 | 0.0035665    | 0.0067253    |
| 48h_IAA     | chr15             | 0.0759076   | 0.0027779 | 0.0706391    | 0.0815346    |
| NT          | chr16             | 0.0223858   | 0.0025906 | 0.0178332    | 0.0280673    |
| 48h_IAA     | chr16             | 0.0811373   | 0.0041514 | 0.0733638    | 0.0896548    |
| NT          | chr17             | 0.0098201   | 0.0009723 | 0.0080865    | 0.0119210    |
| 48h_IAA     | chr17             | 0.0097842   | 0.0011395 | 0.0077855    | 0.0122897    |
| NT          | chr18             | 0.0055285   | 0.0013371 | 0.0034395    | 0.0088748    |
| 48h_IAA     | chr18             | 0.0196290   | 0.0013743 | 0.0171090    | 0.0225117    |
| NT          | chr20             | 0.0112950   | 0.0014747 | 0.0087418    | 0.0145830    |
| 48h_IAA     | chr20             | 0.0574596   | 0.0020562 | 0.0535597    | 0.0616250    |
| NT          | chrX              | 0.0025907   | 0.0014938 | 0.0008358    | 0.0080007    |
| 48h_IAA     | chrX              | 0.0844763   | 0.0049100 | 0.0753371    | 0.0946107    |

### Proportion of loss by chromosome

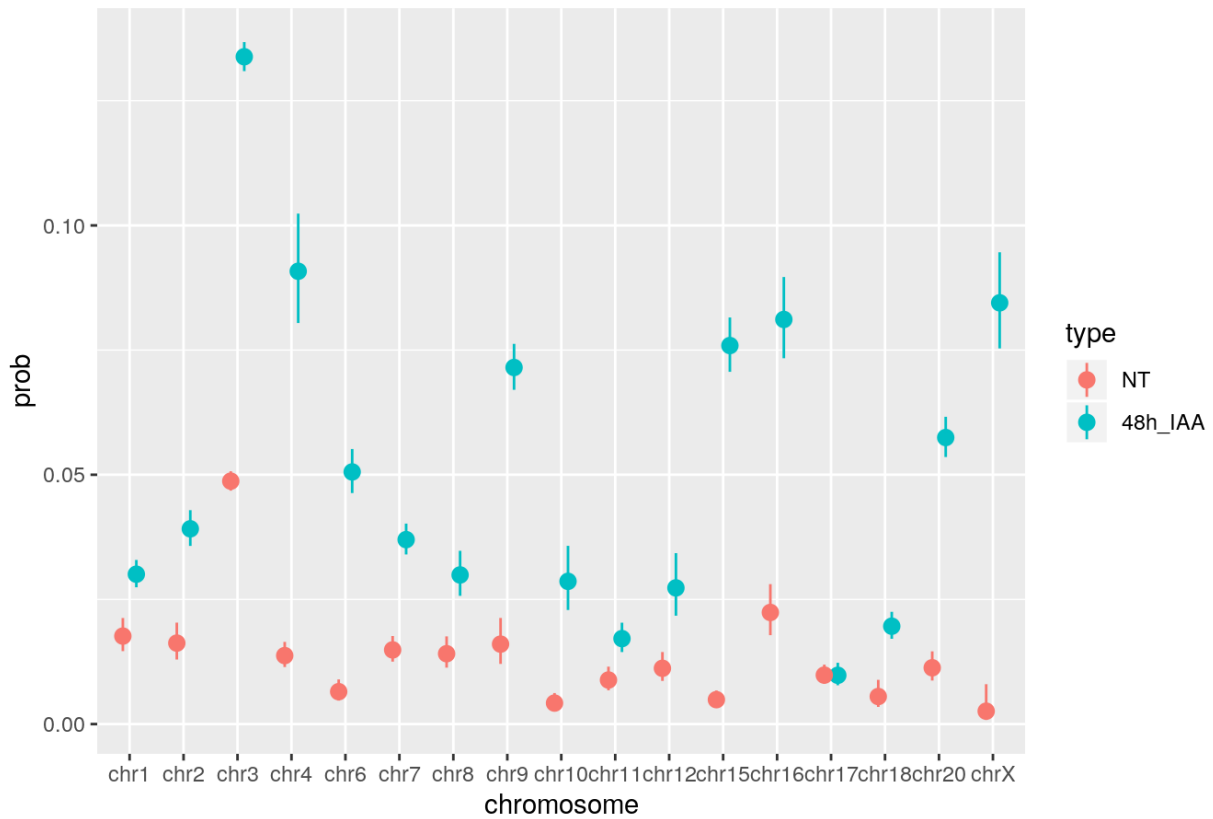

#### 1.1.2.1.2 Anova

Anova table on losses model:

[Code](#)

| term            | df | Deviance  | Resid..Df | Resid..Dev | p.value |
|-----------------|----|-----------|-----------|------------|---------|
| NULL            | NA | NA        | 71        | 17022.384  | NA      |
| chromosome      | 16 | 6842.5377 | 55        | 10179.847  | 0       |
| type            | 1  | 4064.7422 | 54        | 6115.104   | 0       |
| chromosome:type | 16 | 447.5957  | 38        | 5667.509   | 0       |

[Code](#)

#### 1.1.2.1.3 Comparison of NT and 48h\_IAA

Comparison of missegregation rate for each chromosome between NT and 48h\_IAA

[Code](#)

[Code](#)

| chr  | statistic    | p.value   | adj_p.value |
|------|--------------|-----------|-------------|
| chr1 | 25.3700738   | 0.0000005 | 0.0000005   |
| chr2 | 50.7200755   | 0.0000000 | 0.0000000   |
| chr3 | 1955.0787664 | 0.0000000 | 0.0000000   |

| chr   | statistic   | p.value   | adj_p.value |
|-------|-------------|-----------|-------------|
| chr4  | 287.9379229 | 0.0000000 | 0.0000000   |
| chr6  | 149.5442011 | 0.0000000 | 0.0000000   |
| chr7  | 88.1363066  | 0.0000000 | 0.0000000   |
| chr8  | 30.5592437  | 0.0000000 | 0.0000000   |
| chr9  | 105.4441833 | 0.0000000 | 0.0000000   |
| chr10 | 69.8637595  | 0.0000000 | 0.0000000   |
| chr11 | 16.9335017  | 0.0000387 | 0.0000411   |
| chr12 | 26.0518815  | 0.0000003 | 0.0000004   |
| chr15 | 282.7812942 | 0.0000000 | 0.0000000   |
| chr16 | 106.4507300 | 0.0000000 | 0.0000000   |
| chr17 | 0.0005745   | 0.9808776 | 0.9808776   |
| chr18 | 25.5551708  | 0.0000004 | 0.0000005   |
| chr20 | 148.5217297 | 0.0000000 | 0.0000000   |
| chrX  | 37.6858090  | 0.0000000 | 0.0000000   |

## 1.1.2.2 Gains

### 1.1.2.2.1 Estimated proportions for each chromosome

The following table gives the estimated probability for each chromosome with standard error and confidence interval at 95%.

Code

| type    | chromosome | prob      | SE        | lower     | upper     |
|---------|------------|-----------|-----------|-----------|-----------|
| NT      | chr1       | 0.0143791 | 0.0015218 | 0.0116821 | 0.0176876 |
| 48h_IAA | chr1       | 0.0227091 | 0.0012175 | 0.0204413 | 0.0252219 |
| NT      | chr2       | 0.0070237 | 0.0012373 | 0.0049712 | 0.0099152 |
| 48h_IAA | chr2       | 0.0254839 | 0.0014850 | 0.0227297 | 0.0285621 |
| NT      | chr3       | 0.0281210 | 0.0007630 | 0.0266635 | 0.0296558 |
| 48h_IAA | chr3       | 0.0298938 | 0.0007421 | 0.0284731 | 0.0313832 |
| NT      | chr4       | 0.0073512 | 0.0009378 | 0.0057237 | 0.0094369 |
| 48h_IAA | chr4       | 0.0189179 | 0.0026500 | 0.0143665 | 0.0248749 |

| <b>type</b> | <b>chromosome</b> | <b>prob</b> | <b>SE</b> | <b>lower</b> | <b>upper</b> |
|-------------|-------------------|-------------|-----------|--------------|--------------|
| NT          | chr6              | 0.0130007   | 0.0015014 | 0.0103640    | 0.0162972    |
| 48h_IAA     | chr6              | 0.0064258   | 0.0008201 | 0.0050028    | 0.0082502    |
| NT          | chr7              | 0.0029060   | 0.0005803 | 0.0019643    | 0.0042971    |
| 48h_IAA     | chr7              | 0.0102403   | 0.0008403 | 0.0087179    | 0.0120254    |
| NT          | chr8              | 0.0079624   | 0.0011956 | 0.0059305    | 0.0106828    |
| 48h_IAA     | chr8              | 0.0087004   | 0.0012503 | 0.0065626    | 0.0115265    |
| NT          | chr9              | 0.0034118   | 0.0010771 | 0.0018367    | 0.0063291    |
| 48h_IAA     | chr9              | 0.0089589   | 0.0008582 | 0.0074242    | 0.0108074    |
| NT          | chr10             | 0.0062384   | 0.0010224 | 0.0045232    | 0.0085984    |
| 48h_IAA     | chr10             | 0.0145038   | 0.0023357 | 0.0105710    | 0.0198704    |
| NT          | chr11             | 0.0055656   | 0.0009518 | 0.0039794    | 0.0077791    |
| 48h_IAA     | chr11             | 0.0148837   | 0.0013959 | 0.0123816    | 0.0178823    |
| NT          | chr12             | 0.0052083   | 0.0009997 | 0.0035741    | 0.0075841    |
| 48h_IAA     | chr12             | 0.0091047   | 0.0018500 | 0.0061098    | 0.0135476    |
| NT          | chr15             | 0.0103133   | 0.0011471 | 0.0082913    | 0.0128220    |
| 48h_IAA     | chr15             | 0.0113311   | 0.0011101 | 0.0093496    | 0.0137268    |
| NT          | chr16             | 0.0055198   | 0.0012974 | 0.0034804    | 0.0087437    |
| 48h_IAA     | chr16             | 0.0087841   | 0.0014187 | 0.0063981    | 0.0120492    |
| NT          | chr17             | 0.0147788   | 0.0011898 | 0.0126192    | 0.0173015    |
| 48h_IAA     | chr17             | 0.0068355   | 0.0009539 | 0.0051986    | 0.0089833    |
| NT          | chr18             | 0.0107317   | 0.0018581 | 0.0076392    | 0.0150571    |
| 48h_IAA     | chr18             | 0.0119737   | 0.0010775 | 0.0100357    | 0.0142805    |
| NT          | chr20             | 0.0054528   | 0.0010277 | 0.0037675    | 0.0078860    |
| 48h_IAA     | chr20             | 0.0103833   | 0.0008957 | 0.0087670    | 0.0122940    |
| NT          | chrX              | 0.0008636   | 0.0008632 | 0.0001216    | 0.0061035    |
| 48h_IAA     | chrX              | 0.0121571   | 0.0019348 | 0.0088946    | 0.0165963    |

### Proportion of gains by chromosome

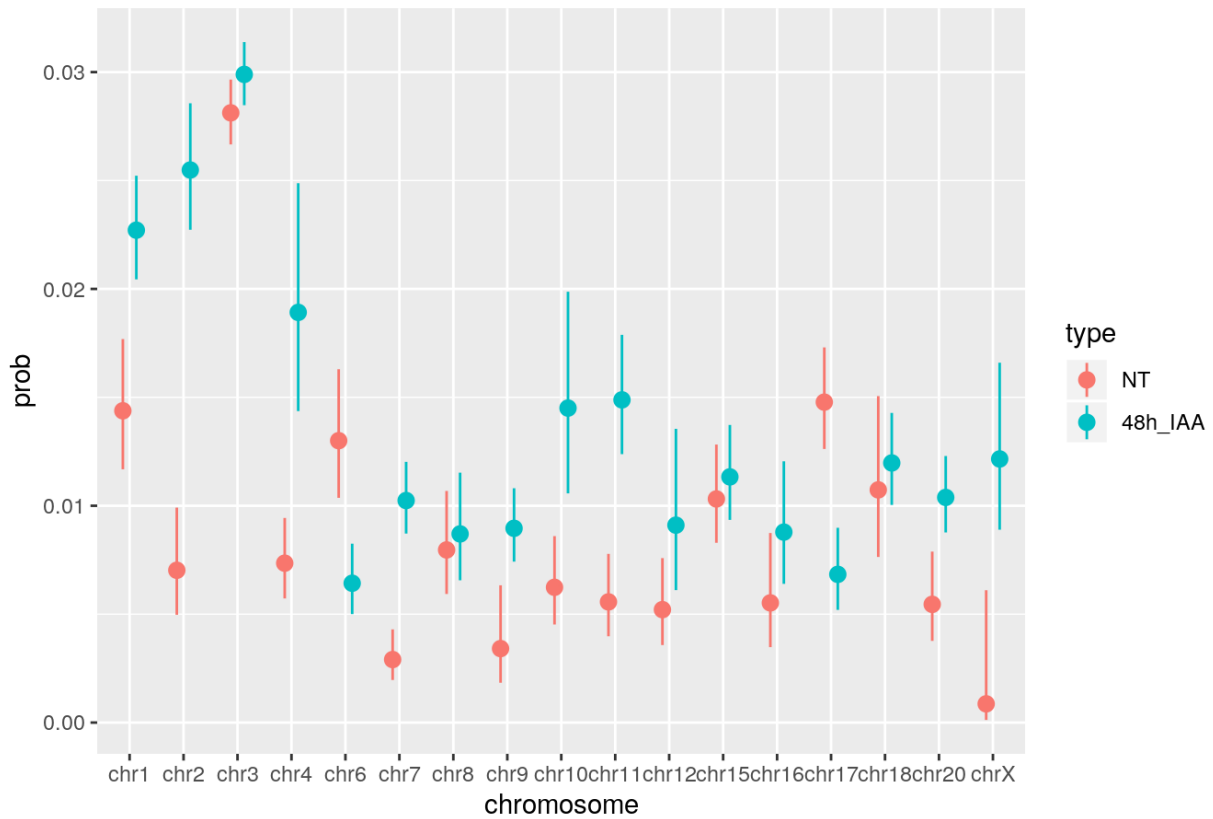

#### 1.1.2.2.2 Anova

Anova table on gains model:

[Code](#)

| term            | df | Deviance   | Resid..Df | Resid..Dev | p.value |
|-----------------|----|------------|-----------|------------|---------|
| NULL            | NA | NA         | 71        | 3014.620   | NA      |
| chromosome      | 16 | 1563.33542 | 55        | 1451.284   | 0       |
| type            | 1  | 53.44579   | 54        | 1397.839   | 0       |
| chromosome:type | 16 | 233.98125  | 38        | 1163.857   | 0       |

[Code](#)

#### 1.1.2.2.3 Comparison of NT and 48h\_IAA

Comparison of missegregation rate for each chromosome between NT and 48h\_IAA

[Code](#)

| chr  | statistic  | p.value   | adj_p.value |
|------|------------|-----------|-------------|
| chr1 | 14.9026279 | 0.0001132 | 0.0002749   |
| chr2 | 48.7813944 | 0.0000000 | 0.0000000   |
| chr3 | 2.7636062  | 0.0964306 | 0.1252321   |
| chr4 | 24.8178556 | 0.0000006 | 0.0000027   |



| chr   | statistic  | p.value   | adj_p.value |
|-------|------------|-----------|-------------|
| chr6  | 16.7593565 | 0.0000424 | 0.0001202   |
| chr7  | 34.1600165 | 0.0000000 | 0.0000000   |
| chr8  | 0.1818924  | 0.6697519 | 0.6697519   |
| chr9  | 8.5957306  | 0.0033695 | 0.0057282   |
| chr10 | 13.4688902 | 0.0002426 | 0.0005154   |
| chr11 | 25.5233451 | 0.0000004 | 0.0000025   |
| chr12 | 3.9903461  | 0.0457617 | 0.0648290   |
| chr15 | 0.4032880  | 0.5253961 | 0.5954489   |
| chr16 | 2.6564245  | 0.1031323 | 0.1252321   |
| chr17 | 22.9738102 | 0.0000016 | 0.0000056   |
| chr18 | 0.3151754  | 0.5745216 | 0.6104292   |
| chr20 | 9.6824319  | 0.0018604 | 0.0035141   |
| chrX  | 6.8699504  | 0.0087657 | 0.0135470   |

## 1.2 Analysis of 48h\_IAA data only

### 1.2.1 Model

A generalized linear model is fitted between gains or losses fractions and chromosomes with a quasibinomial family and weights of observation equal to number of cells.

Code

### 1.2.2 Results

#### 1.2.2.1 Losses

##### 1.2.2.1.1 Estimated proportions for each chromosome

The following table gives the estimated probability for each chromosome with standard error and confidence interval at 95%.

Code

Code

| chromosome | prob      | SE        | lower     | upper     |
|------------|-----------|-----------|-----------|-----------|
| chr1       | 0.0300561 | 0.0013954 | 0.0274385 | 0.0329150 |
| chr2       | 0.0391582 | 0.0018278 | 0.0357289 | 0.0429021 |

| <b>chromosome</b> | <b>prob</b> | <b>SE</b> | <b>lower</b> | <b>upper</b> |
|-------------------|-------------|-----------|--------------|--------------|
| chr3              | 0.1338195   | 0.0014837 | 0.1309381    | 0.1367544    |
| chr4              | 0.0908059   | 0.0055890 | 0.0804301    | 0.1023712    |
| chr6              | 0.0505636   | 0.0022488 | 0.0463335    | 0.0551575    |
| chr7              | 0.0369906   | 0.0015753 | 0.0340240    | 0.0402051    |
| chr8              | 0.0299076   | 0.0022932 | 0.0257258    | 0.0347448    |
| chr9              | 0.0715056   | 0.0023468 | 0.0670403    | 0.0762440    |
| chr10             | 0.0286260   | 0.0032578 | 0.0228872    | 0.0357510    |
| chr11             | 0.0171429   | 0.0014964 | 0.0144437    | 0.0203360    |
| chr12             | 0.0273141   | 0.0031747 | 0.0217349    | 0.0342753    |
| chr15             | 0.0759076   | 0.0027779 | 0.0706391    | 0.0815346    |
| chr16             | 0.0811373   | 0.0041514 | 0.0733638    | 0.0896548    |
| chr17             | 0.0097842   | 0.0011395 | 0.0077855    | 0.0122897    |
| chr18             | 0.0196290   | 0.0013743 | 0.0171090    | 0.0225117    |
| chr20             | 0.0574596   | 0.0020562 | 0.0535597    | 0.0616250    |
| chrX              | 0.0844763   | 0.0049100 | 0.0753371    | 0.0946107    |

Code

### Proportion of loss by chromosome

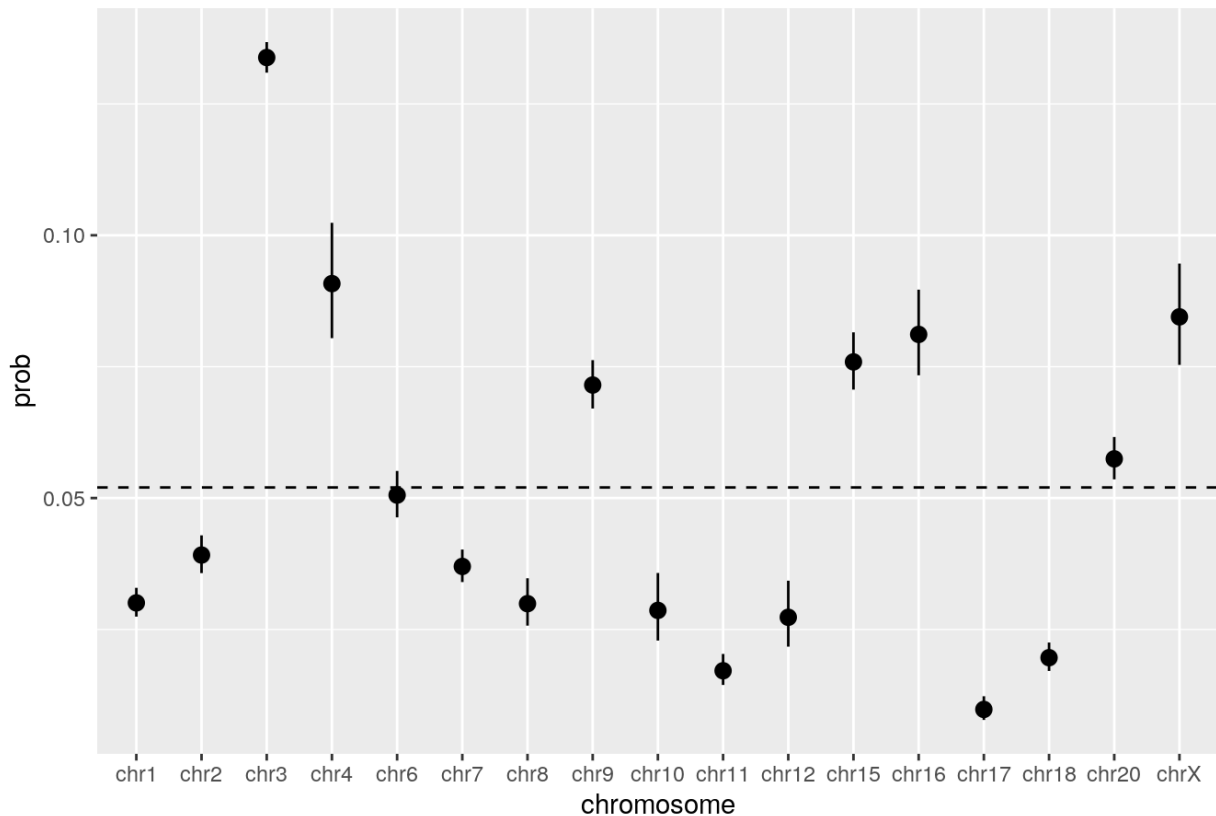

#### 1.2.2.1.2 Anova

Anova table on losses model:

Code

| term       | df | Deviance | Resid..Df | Resid..Dev | p.value |
|------------|----|----------|-----------|------------|---------|
| NULL       | NA | NA       | 47        | 171687.515 | NA      |
| chromosome | 17 | 166332.2 | 30        | 5355.295   | 0       |

Code

With a p-value of 0.00e+00, we conclude that there is an effect of the chromosomes on the the percentage of losses (i.e. at least one chromosome has a percentage different from the others).

#### 1.2.2.1.3 Test against mean value

Each estimated coefficients is tested against the mean value (0.0520167).

Code

| chr  | statistic    | p.value   | adj_p.value |
|------|--------------|-----------|-------------|
| chr1 | 142.5083941  | 0.0000000 | 0.0000000   |
| chr2 | 37.4845126   | 0.0000000 | 0.0000000   |
| chr3 | 6539.9589926 | 0.0000000 | 0.0000000   |
| chr4 | 78.2764208   | 0.0000000 | 0.0000000   |
| chr6 | 0.4064809    | 0.5237611 | 0.5237611   |

| chr   | statistic   | p.value   | adj_p.value |
|-------|-------------|-----------|-------------|
| chr7  | 65.0361652  | 0.0000000 | 0.0000000   |
| chr8  | 53.1995691  | 0.0000000 | 0.0000000   |
| chr9  | 91.9693535  | 0.0000000 | 0.0000000   |
| chr10 | 28.1517897  | 0.0000001 | 0.0000001   |
| chr11 | 166.5455164 | 0.0000000 | 0.0000000   |
| chr12 | 31.4272716  | 0.0000000 | 0.0000000   |
| chr15 | 103.8008640 | 0.0000000 | 0.0000000   |
| chr16 | 73.0073504  | 0.0000000 | 0.0000000   |
| chr17 | 212.4552203 | 0.0000000 | 0.0000000   |
| chr18 | 199.2834362 | 0.0000000 | 0.0000000   |
| chr20 | 7.6882883   | 0.0055580 | 0.0059054   |
| chrX  | 67.0227859  | 0.0000000 | 0.0000000   |

## 1.2.2.2 Gains

### 1.2.2.2.1 Estimated proportions for each chromosome

The following table gives the estimated probability for each chromosome with standard error and confidence interval at 95%.

Code

Code

| chromosome | prob      | SE        | lower     | upper     |
|------------|-----------|-----------|-----------|-----------|
| chr1       | 0.0227091 | 0.0012175 | 0.0204413 | 0.0252219 |
| chr2       | 0.0254839 | 0.0014850 | 0.0227297 | 0.0285621 |
| chr3       | 0.0298938 | 0.0007421 | 0.0284731 | 0.0313832 |
| chr4       | 0.0189179 | 0.0026500 | 0.0143665 | 0.0248749 |
| chr6       | 0.0064258 | 0.0008201 | 0.0050028 | 0.0082502 |
| chr7       | 0.0102403 | 0.0008403 | 0.0087179 | 0.0120254 |
| chr8       | 0.0087004 | 0.0012503 | 0.0065626 | 0.0115265 |
| chr9       | 0.0089589 | 0.0008582 | 0.0074242 | 0.0108074 |
| chr10      | 0.0145038 | 0.0023357 | 0.0105710 | 0.0198704 |

| chromosome | prob      | SE        | lower     | upper     |
|------------|-----------|-----------|-----------|-----------|
| chr11      | 0.0148837 | 0.0013959 | 0.0123816 | 0.0178823 |
| chr12      | 0.0091047 | 0.0018500 | 0.0061098 | 0.0135476 |
| chr15      | 0.0113311 | 0.0011101 | 0.0093496 | 0.0137268 |
| chr16      | 0.0087841 | 0.0014187 | 0.0063981 | 0.0120492 |
| chr17      | 0.0068355 | 0.0009539 | 0.0051986 | 0.0089833 |
| chr18      | 0.0119737 | 0.0010775 | 0.0100357 | 0.0142805 |
| chr20      | 0.0103833 | 0.0008957 | 0.0087670 | 0.0122940 |
| chrX       | 0.0121571 | 0.0019348 | 0.0088946 | 0.0165963 |

Code

Proportion of gain by chromosome

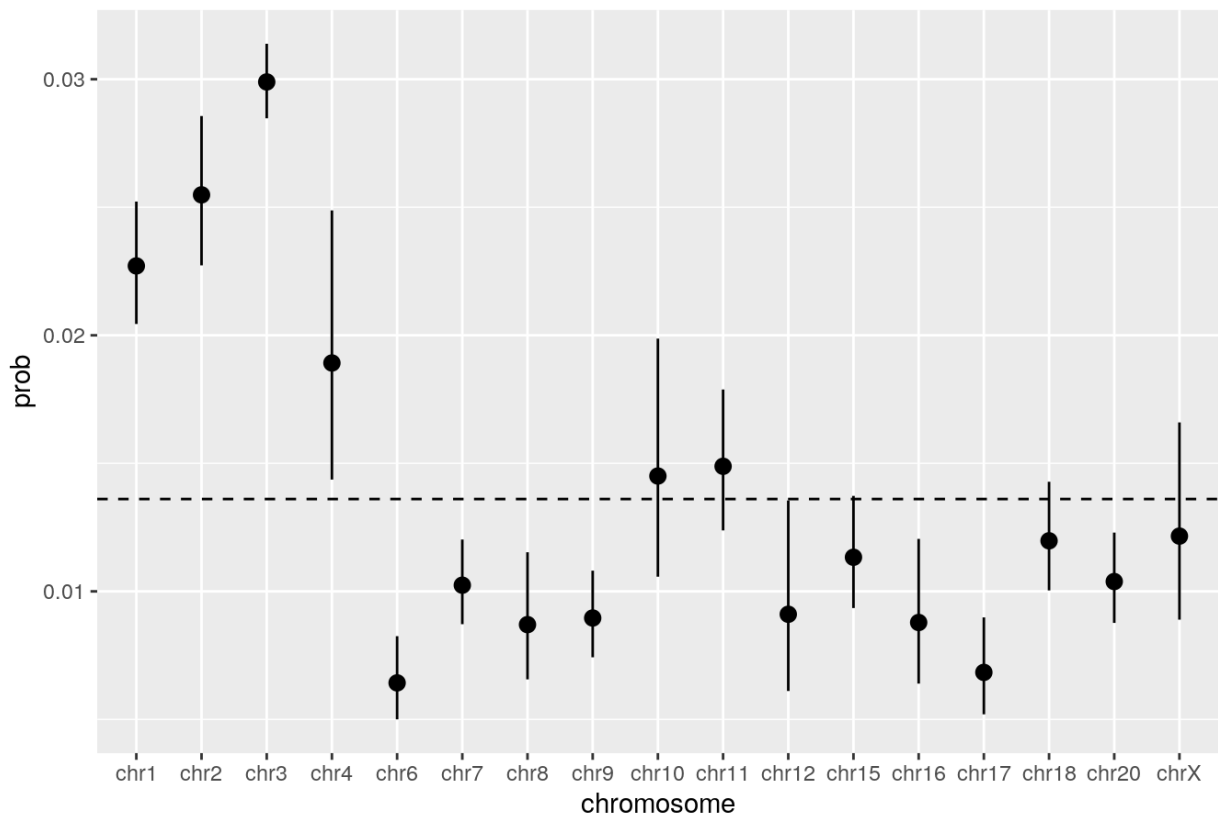

### 1.2.2.2.2 Anova

Anova table on gains model:

Code

| term       | df | Deviance | Resid..Df | Resid..Dev  | p.value |
|------------|----|----------|-----------|-------------|---------|
| NULL       | NA | NA       | 47        | 222427.3404 | NA      |
| chromosome | 17 | 221475.4 | 30        | 951.8935    | 0       |

Code

With a p-value of 0.00e+00, we conclude that there is an effect of the chromosomes on the the percentage of losses (i.e. at least one chromosome has a percentage different from the others).

### 1.2.2.2.3 Test against mean value

Each estimated coefficients is tested against the mean value (0.0136051).

Code

| chr   | statistic   | p.value   | adj_p.value |
|-------|-------------|-----------|-------------|
| chr1  | 90.3981205  | 0.0000000 | 0.0000000   |
| chr2  | 114.4579286 | 0.0000000 | 0.0000000   |
| chr3  | 986.6898524 | 0.0000000 | 0.0000000   |
| chr4  | 5.5071233   | 0.0189392 | 0.0292696   |
| chr6  | 34.7662607  | 0.0000000 | 0.0000000   |
| chr7  | 12.0275873  | 0.0005242 | 0.0012730   |
| chr8  | 9.7230188   | 0.0018197 | 0.0034373   |
| chr9  | 19.1054903  | 0.0000124 | 0.0000350   |
| chr10 | 0.1576184   | 0.6913587 | 0.6913587   |
| chr11 | 0.9160349   | 0.3385182 | 0.3836540   |
| chr12 | 3.9240673   | 0.0475996 | 0.0674327   |
| chr15 | 3.4926177   | 0.0616430 | 0.0806101   |
| chr16 | 7.3712824   | 0.0066274 | 0.0112665   |
| chr17 | 24.4764944  | 0.0000008 | 0.0000026   |
| chr18 | 2.0179636   | 0.1554475 | 0.1887577   |
| chr20 | 9.8459144   | 0.0017021 | 0.0034373   |
| chrX  | 0.5006847   | 0.4791994 | 0.5091494   |

## 1.3 Analysis of NT data only

### 1.3.1 Model

A generalized linear model is fitted between gains or losses fractions and chromosomes with a quasibinomial family and weights of observation equal to number of cells.

Code

## 1.3.2 Results

### 1.3.2.1 Losses

#### 1.3.2.1.1 Estimated proportions for each chromosome

The following table gives the estimated probability for each chromosome with standard error and confidence interval at 95%.

[Code](#)[Code](#)

| <b>chromosome</b> | <b>prob</b> | <b>SE</b> | <b>lower</b> | <b>upper</b> |
|-------------------|-------------|-----------|--------------|--------------|
| chr1              | 0.0176471   | 0.0016830 | 0.0146340    | 0.0212671    |
| chr2              | 0.0162423   | 0.0018727 | 0.0129519    | 0.0203514    |
| chr3              | 0.0487218   | 0.0009937 | 0.0468107    | 0.0507067    |
| chr4              | 0.0137383   | 0.0012778 | 0.0114463    | 0.0164815    |
| chr6              | 0.0065004   | 0.0010652 | 0.0047133    | 0.0089589    |
| chr7              | 0.0148785   | 0.0013053 | 0.0125255    | 0.0176657    |
| chr8              | 0.0141151   | 0.0015869 | 0.0113200    | 0.0175881    |
| chr9              | 0.0160355   | 0.0023202 | 0.0120687    | 0.0212780    |
| chr10             | 0.0042151   | 0.0008412 | 0.0028498    | 0.0062306    |
| chr11             | 0.0088394   | 0.0011976 | 0.0067761    | 0.0115238    |
| chr12             | 0.0111883   | 0.0014609 | 0.0086591    | 0.0144454    |
| chr15             | 0.0048988   | 0.0007927 | 0.0035665    | 0.0067253    |
| chr16             | 0.0223858   | 0.0025906 | 0.0178332    | 0.0280673    |
| chr17             | 0.0098201   | 0.0009723 | 0.0080865    | 0.0119210    |
| chr18             | 0.0055285   | 0.0013371 | 0.0034395    | 0.0088748    |
| chr20             | 0.0112950   | 0.0014747 | 0.0087418    | 0.0145830    |
| chrX              | 0.0025907   | 0.0014938 | 0.0008358    | 0.0080007    |

[Code](#)

### Proportion of loss by chromosome

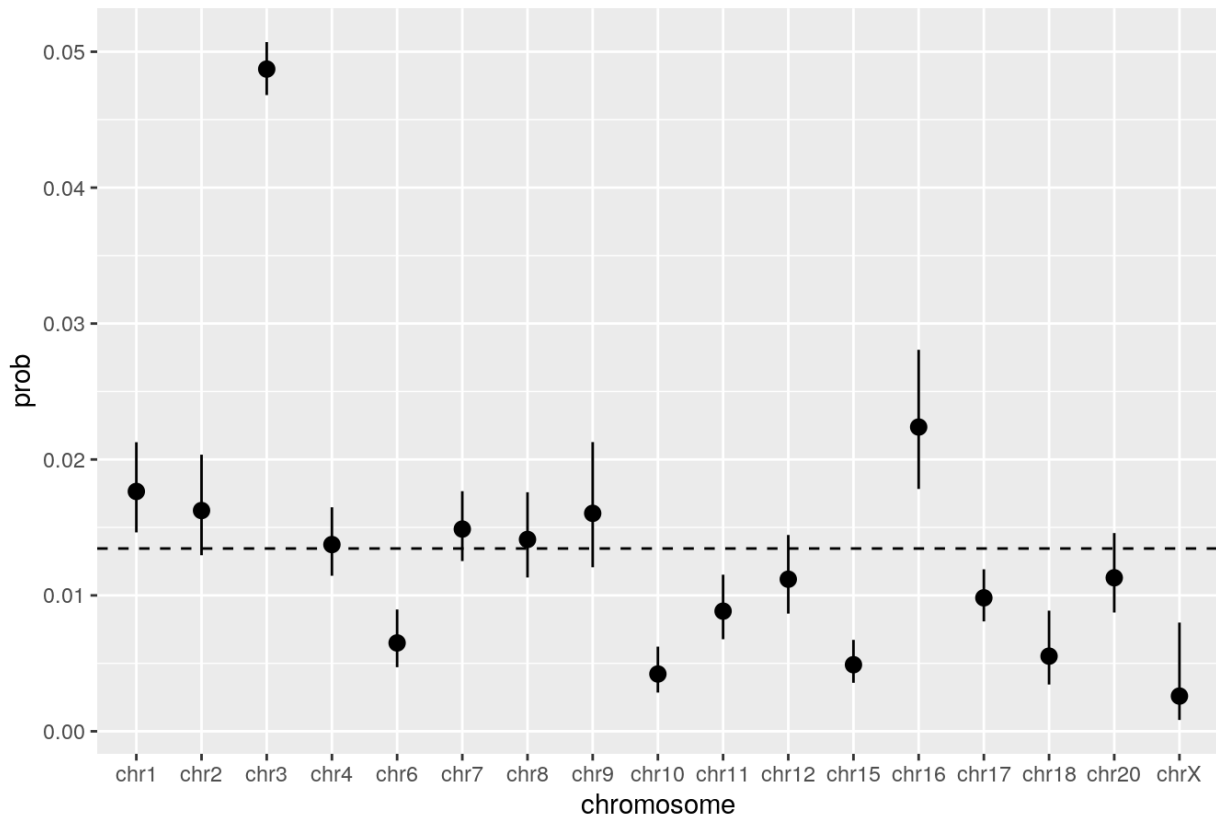

#### 1.3.2.1.2 Anova

Anova table on losses model:

Code

| term       | df | Deviance | Resid..Df | Resid..Dev  | p.value |
|------------|----|----------|-----------|-------------|---------|
| NULL       | NA | NA       | 25        | 160438.7860 | NA      |
| chromosome | 17 | 160126.6 | 8         | 312.2142    | 0       |

Code

With a p-value of 0.00e+00, we conclude that there is an effect of the chromosomes on the the percentage of losses (i.e. at least one chromosome has a percentage different from the others).

#### 1.3.2.1.3 Test against mean value

Each estimated coefficients is tested against the mean value (0.0134494).

Code

| chr  | statistic    | p.value   | adj_p.value |
|------|--------------|-----------|-------------|
| chr1 | 8.0756940    | 0.0044863 | 0.0076267   |
| chr2 | 2.6701498    | 0.1022464 | 0.1580172   |
| chr3 | 3811.4020426 | 0.0000000 | 0.0000000   |
| chr4 | 0.0521610    | 0.8193447 | 0.8193447   |
| chr6 | 19.8098380   | 0.0000086 | 0.0000364   |



| chr   | statistic  | p.value   | adj_p.value |
|-------|------------|-----------|-------------|
| chr7  | 1.3230119  | 0.2500522 | 0.2833925   |
| chr8  | 0.1844973  | 0.6675365 | 0.7092575   |
| chr9  | 1.4733621  | 0.2248160 | 0.2729908   |
| chr10 | 34.0532863 | 0.0000000 | 0.0000000   |
| chr11 | 9.6392923  | 0.0019046 | 0.0040472   |
| chr12 | 1.9918292  | 0.1581498 | 0.2240455   |
| chr15 | 39.2318413 | 0.0000000 | 0.0000000   |
| chr16 | 19.1926071 | 0.0000118 | 0.0000402   |
| chr17 | 10.1244119 | 0.0014632 | 0.0035534   |
| chr18 | 13.6035286 | 0.0002258 | 0.0006397   |
| chr20 | 1.7916082  | 0.1807303 | 0.2363397   |
| chrX  | 8.2251949  | 0.0041313 | 0.0076267   |

## 1.3.2.2 Gains

### 1.3.2.2.1 Estimated proportions for each chromosome

The following table gives the estimated probability for each chromosome with standard error and confidence interval at 95%.

Code

Code

| chromosome | prob      | SE        | lower     | upper     |
|------------|-----------|-----------|-----------|-----------|
| chr1       | 0.0143791 | 0.0015218 | 0.0116821 | 0.0176876 |
| chr2       | 0.0070237 | 0.0012373 | 0.0049712 | 0.0099152 |
| chr3       | 0.0281210 | 0.0007630 | 0.0266635 | 0.0296558 |
| chr4       | 0.0073512 | 0.0009378 | 0.0057237 | 0.0094369 |
| chr6       | 0.0130007 | 0.0015014 | 0.0103640 | 0.0162972 |
| chr7       | 0.0029060 | 0.0005803 | 0.0019643 | 0.0042971 |
| chr8       | 0.0079624 | 0.0011956 | 0.0059305 | 0.0106828 |
| chr9       | 0.0034118 | 0.0010771 | 0.0018367 | 0.0063291 |
| chr10      | 0.0062384 | 0.0010224 | 0.0045232 | 0.0085984 |

| chromosome | prob      | SE        | lower     | upper     |
|------------|-----------|-----------|-----------|-----------|
| chr11      | 0.0055656 | 0.0009518 | 0.0039794 | 0.0077791 |
| chr12      | 0.0052083 | 0.0009997 | 0.0035741 | 0.0075841 |
| chr15      | 0.0103133 | 0.0011471 | 0.0082913 | 0.0128220 |
| chr16      | 0.0055198 | 0.0012974 | 0.0034804 | 0.0087437 |
| chr17      | 0.0147788 | 0.0011898 | 0.0126192 | 0.0173015 |
| chr18      | 0.0107317 | 0.0018581 | 0.0076392 | 0.0150571 |
| chr20      | 0.0054528 | 0.0010277 | 0.0037675 | 0.0078860 |
| chrX       | 0.0008636 | 0.0008632 | 0.0001216 | 0.0061035 |

Code

Proportion of gain by chromosome

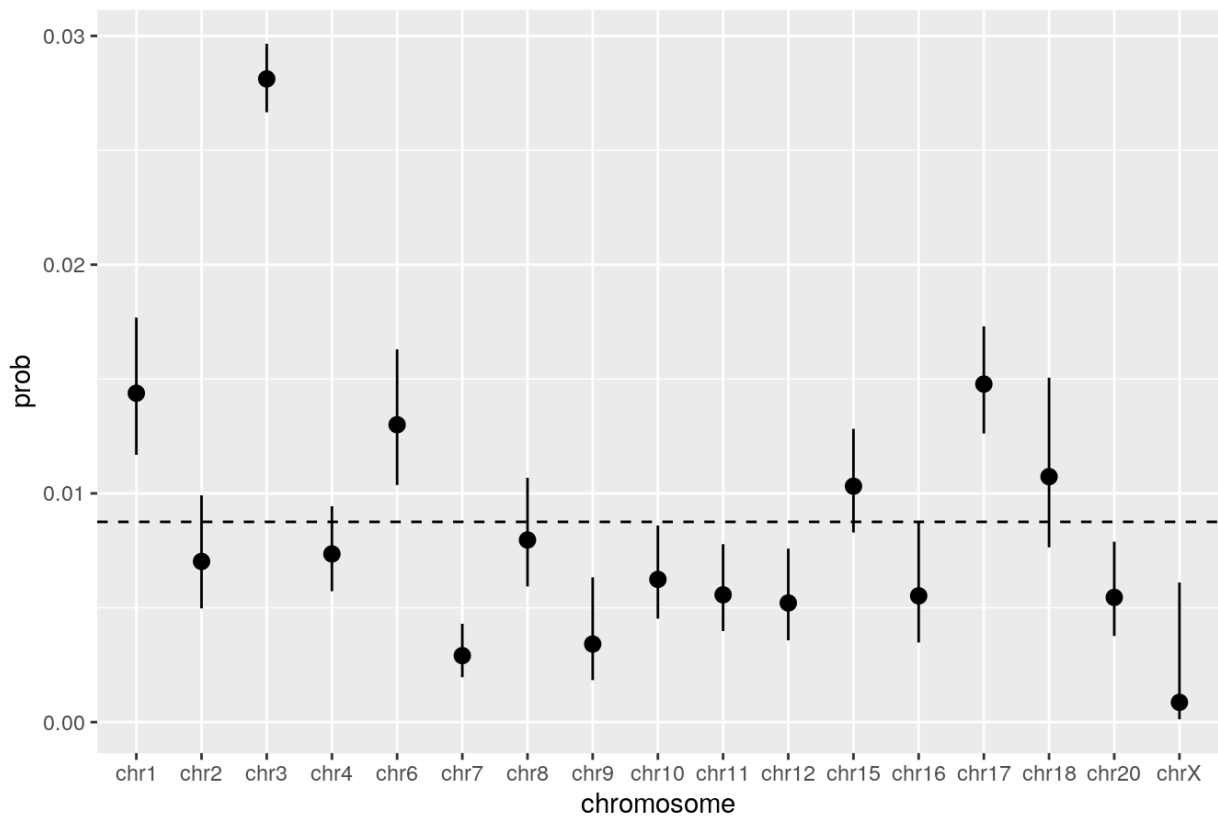

### 1.3.2.2.2 Anova

Anova table on gains model:

Code

| term       | df | Deviance | Resid..Df | Resid..Dev | p.value |
|------------|----|----------|-----------|------------|---------|
| NULL       | NA | NA       | 25        | 169059.599 | NA      |
| chromosome | 17 | 168847.6 | 8         | 211.964    | 0       |

Code

With a p-value of 0.00e+00, we conclude that there is an effect of the chromosomes on the the percentage of losses (i.e. at least one chromosome has a percentage different from the others).

### 1.3.2.2.3 Test against mean value

Each estimated coefficients is tested against the mean value (0.0087546).

Code

| chr   | statistic    | p.value   | adj_p.value |
|-------|--------------|-----------|-------------|
| chr1  | 21.8476565   | 0.0000030 | 0.0000125   |
| chr2  | 1.5664571    | 0.2107223 | 0.2388186   |
| chr3  | 1806.5331416 | 0.0000000 | 0.0000000   |
| chr4  | 1.8784880    | 0.1705061 | 0.2070431   |
| chr6  | 11.6696236   | 0.0006353 | 0.0021600   |
| chr7  | 30.6408656   | 0.0000000 | 0.0000002   |
| chr8  | 0.3993584    | 0.5274208 | 0.5274208   |
| chr9  | 8.9509349    | 0.0027733 | 0.0078576   |
| chr10 | 4.2852905    | 0.0384435 | 0.0594127   |
| chr11 | 7.0364113    | 0.0079869 | 0.0169721   |
| chr12 | 7.3437029    | 0.0067298 | 0.0163438   |
| chr15 | 2.1667041    | 0.1410282 | 0.1844215   |
| chr16 | 3.8622147    | 0.0493851 | 0.0699622   |
| chr17 | 42.0201092   | 0.0000000 | 0.0000000   |
| chr18 | 1.3802720    | 0.2400548 | 0.2550582   |
| chr20 | 6.3301930    | 0.0118699 | 0.0224210   |
| chrX  | 5.3972473    | 0.0201685 | 0.0342865   |

## 1.4 Gains and losses pooled

In this part gains and losses are pooled.

Code

Code

The following table gives the estimated probability for each chromosome with standard error and confidence interval at 95%.

Code

| <b>type</b> | <b>chromosome</b> | <b>prob</b> | <b>SE</b> | <b>lower</b> | <b>upper</b> |
|-------------|-------------------|-------------|-----------|--------------|--------------|
| NT          | chr1              | 0.0320261   | 0.0022507 | 0.0278969    | 0.0367435    |
| 48h_IAA     | chr1              | 0.0527652   | 0.0018271 | 0.0492967    | 0.0564631    |
| NT          | chr2              | 0.0232660   | 0.0022334 | 0.0192682    | 0.0280696    |
| 48h_IAA     | chr2              | 0.0646422   | 0.0023171 | 0.0602466    | 0.0693348    |
| NT          | chr3              | 0.0768428   | 0.0012293 | 0.0744677    | 0.0792871    |
| 48h_IAA     | chr3              | 0.1637134   | 0.0016125 | 0.1605774    | 0.1668984    |
| NT          | chr4              | 0.0210894   | 0.0015773 | 0.0182098    | 0.0244130    |
| 48h_IAA     | chr4              | 0.1097238   | 0.0060794 | 0.0983632    | 0.1222186    |
| NT          | chr6              | 0.0195011   | 0.0018328 | 0.0162151    | 0.0234370    |
| 48h_IAA     | chr6              | 0.0569894   | 0.0023793 | 0.0525013    | 0.0618360    |
| NT          | chr7              | 0.0177845   | 0.0014249 | 0.0151967    | 0.0208037    |
| 48h_IAA     | chr7              | 0.0472309   | 0.0017705 | 0.0438794    | 0.0508248    |
| NT          | chr8              | 0.0218965   | 0.0019687 | 0.0183528    | 0.0261063    |
| 48h_IAA     | chr8              | 0.0386079   | 0.0025938 | 0.0338334    | 0.0440256    |
| NT          | chr9              | 0.0194473   | 0.0025507 | 0.0150298    | 0.0251300    |
| 48h_IAA     | chr9              | 0.0804645   | 0.0024774 | 0.0757406    | 0.0854559    |
| NT          | chr10             | 0.0104535   | 0.0013206 | 0.0081583    | 0.0133859    |
| 48h_IAA     | chr10             | 0.0431298   | 0.0039688 | 0.0359872    | 0.0516141    |
| NT          | chr11             | 0.0144050   | 0.0015245 | 0.0117031    | 0.0177194    |
| 48h_IAA     | chr11             | 0.0320266   | 0.0020297 | 0.0282786    | 0.0362527    |
| NT          | chr12             | 0.0163966   | 0.0017638 | 0.0132751    | 0.0202370    |
| 48h_IAA     | chr12             | 0.0364188   | 0.0036487 | 0.0299054    | 0.0442861    |
| NT          | chr15             | 0.0152121   | 0.0013897 | 0.0127153    | 0.0181901    |
| 48h_IAA     | chr15             | 0.0872387   | 0.0029597 | 0.0816095    | 0.0932168    |
| NT          | chr16             | 0.0279056   | 0.0028842 | 0.0227758    | 0.0341502    |
| 48h_IAA     | chr16             | 0.0899214   | 0.0043494 | 0.0817531    | 0.0988180    |
| NT          | chr17             | 0.0245989   | 0.0015274 | 0.0217764    | 0.0277769    |

| type    | chromosome | prob      | SE        | lower     | upper     |
|---------|------------|-----------|-----------|-----------|-----------|
| 48h_IAA | chr17      | 0.0166198 | 0.0014800 | 0.0139546 | 0.0197837 |
| NT      | chr18      | 0.0162602 | 0.0022808 | 0.0123447 | 0.0213906 |
| 48h_IAA | chr18      | 0.0316027 | 0.0017331 | 0.0283769 | 0.0351819 |
| NT      | chr20      | 0.0167478 | 0.0017908 | 0.0135766 | 0.0206443 |
| 48h_IAA | chr20      | 0.0678429 | 0.0022220 | 0.0636154 | 0.0723297 |
| NT      | chrX       | 0.0034542 | 0.0017241 | 0.0012970 | 0.0091663 |
| 48h_IAA | chrX       | 0.0966334 | 0.0052165 | 0.0868812 | 0.1073517 |

Code

Proportion of missegregation by chromosome

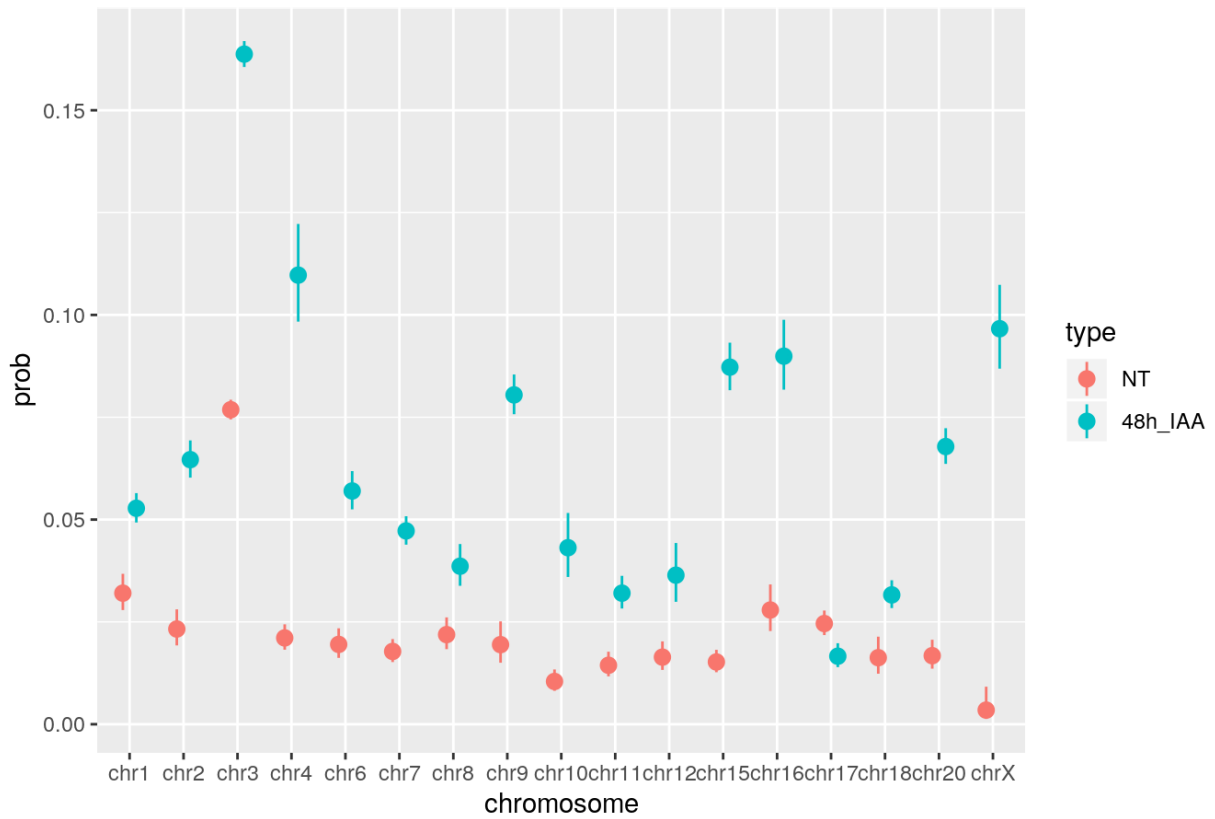

Comparison between NT and 48h\_IAA

Code

| chr  | statistic  | p.value   | adj_p.value |
|------|------------|-----------|-------------|
| chr1 | 41.07589   | 0.0000000 | 0.0000000   |
| chr2 | 101.96253  | 0.0000000 | 0.0000000   |
| chr3 | 1665.79160 | 0.0000000 | 0.0000000   |
| chr4 | 313.25350  | 0.0000000 | 0.0000000   |

| chr   | statistic | p.value   | adj_p.value |
|-------|-----------|-----------|-------------|
| chr6  | 110.79740 | 0.0000000 | 0.0000000   |
| chr7  | 123.66870 | 0.0000000 | 0.0000000   |
| chr8  | 25.61210  | 0.0000004 | 0.0000005   |
| chr9  | 115.88498 | 0.0000000 | 0.0000000   |
| chr10 | 82.39314  | 0.0000000 | 0.0000000   |
| chr11 | 42.20581  | 0.0000000 | 0.0000000   |
| chr12 | 29.42617  | 0.0000001 | 0.0000001   |
| chr15 | 332.58568 | 0.0000000 | 0.0000000   |
| chr16 | 108.12927 | 0.0000000 | 0.0000000   |
| chr17 | 13.07481  | 0.0002993 | 0.0002993   |
| chr18 | 19.65932  | 0.0000093 | 0.0000098   |
| chr20 | 161.49131 | 0.0000000 | 0.0000000   |
| chrX  | 46.22516  | 0.0000000 | 0.0000000   |

### 1.4.1 Pooled data 48h\_IAA

Code  
Code  
Code

| chromosome | prob      | SE        | lower     | upper     |
|------------|-----------|-----------|-----------|-----------|
| chr1       | 0.0527652 | 0.0018271 | 0.0492967 | 0.0564631 |
| chr2       | 0.0646422 | 0.0023171 | 0.0602466 | 0.0693348 |
| chr3       | 0.1637134 | 0.0016125 | 0.1605774 | 0.1668984 |
| chr4       | 0.1097238 | 0.0060794 | 0.0983632 | 0.1222186 |
| chr6       | 0.0569894 | 0.0023793 | 0.0525013 | 0.0618360 |
| chr7       | 0.0472309 | 0.0017705 | 0.0438794 | 0.0508248 |
| chr8       | 0.0386079 | 0.0025938 | 0.0338334 | 0.0440256 |
| chr9       | 0.0804645 | 0.0024774 | 0.0757406 | 0.0854559 |
| chr10      | 0.0431298 | 0.0039688 | 0.0359872 | 0.0516141 |

| chromosome | prob      | SE        | lower     | upper     |
|------------|-----------|-----------|-----------|-----------|
| chr11      | 0.0320266 | 0.0020297 | 0.0282786 | 0.0362527 |
| chr12      | 0.0364188 | 0.0036487 | 0.0299054 | 0.0442861 |
| chr15      | 0.0872387 | 0.0029597 | 0.0816095 | 0.0932168 |
| chr16      | 0.0899214 | 0.0043494 | 0.0817531 | 0.0988180 |
| chr17      | 0.0166198 | 0.0014800 | 0.0139546 | 0.0197837 |
| chr18      | 0.0316027 | 0.0017331 | 0.0283769 | 0.0351819 |
| chr20      | 0.0678429 | 0.0022220 | 0.0636154 | 0.0723297 |
| chrX       | 0.0966334 | 0.0052165 | 0.0868812 | 0.1073517 |

Code

Proportion of missegregation by chromosome - 48h\_IAA

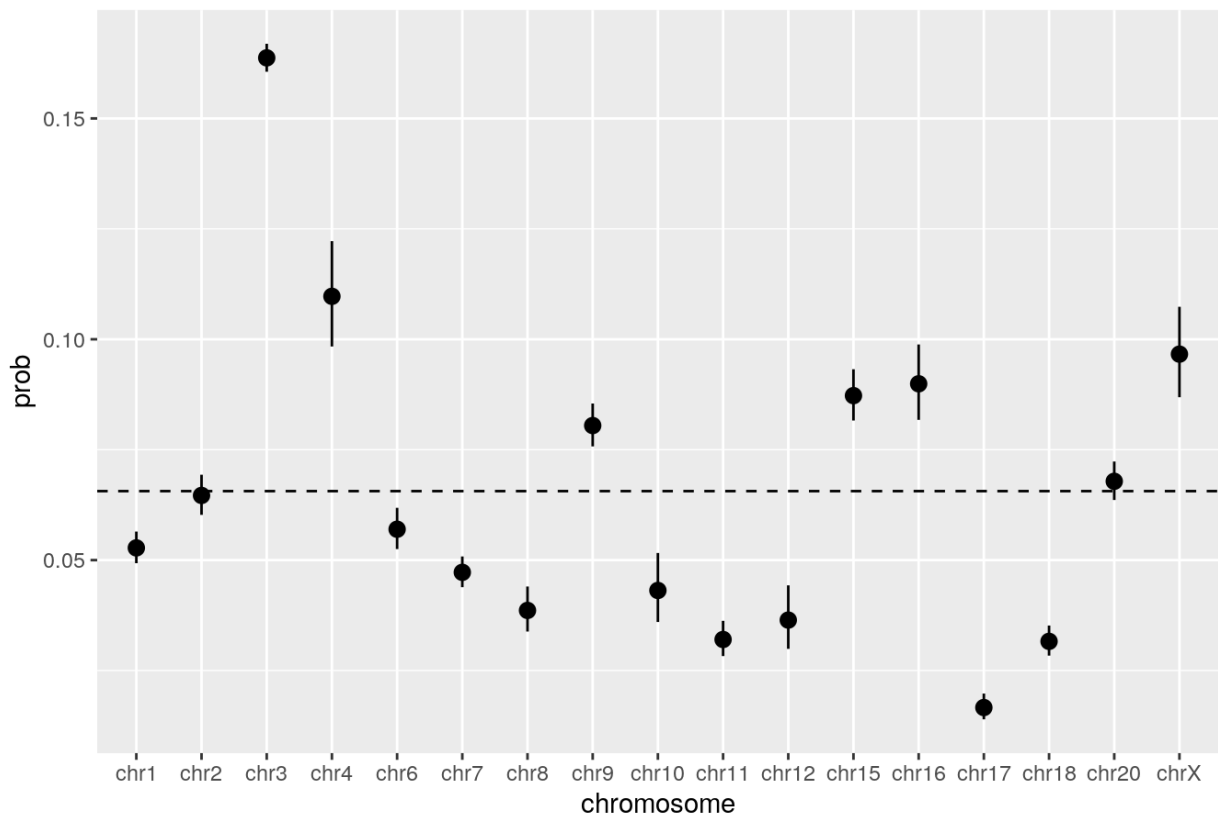

Each estimated coefficients is tested against the mean value (0.0656218).

Code

| chr  | statistic   | p.value   | adj_p.value |
|------|-------------|-----------|-------------|
| chr1 | 40.181324   | 0.0000000 | 0.0000000   |
| chr2 | 0.176282    | 0.6745881 | 0.6745881   |
| chr3 | 7575.543793 | 0.0000000 | 0.0000000   |

| chr   | statistic  | p.value   | adj_p.value |
|-------|------------|-----------|-------------|
| chr4  | 81.662826  | 0.0000000 | 0.0000000   |
| chr6  | 11.515615  | 0.0006901 | 0.0007822   |
| chr7  | 78.388363  | 0.0000000 | 0.0000000   |
| chr8  | 63.977745  | 0.0000000 | 0.0000000   |
| chr9  | 43.139177  | 0.0000000 | 0.0000000   |
| chr10 | 21.265858  | 0.0000040 | 0.0000049   |
| chr11 | 132.155420 | 0.0000000 | 0.0000000   |
| chr12 | 35.512429  | 0.0000000 | 0.0000000   |
| chr15 | 68.729786  | 0.0000000 | 0.0000000   |
| chr16 | 41.257098  | 0.0000000 | 0.0000000   |
| chr17 | 247.415050 | 0.0000000 | 0.0000000   |
| chr18 | 183.168690 | 0.0000000 | 0.0000000   |
| chr20 | 1.030448   | 0.3100536 | 0.3294319   |
| chrX  | 49.580708  | 0.0000000 | 0.0000000   |

## 1.4.2 Pooled data NT

Code

Code

Code

| chromosome | prob      | SE        | lower     | upper     |
|------------|-----------|-----------|-----------|-----------|
| chr1       | 0.0320261 | 0.0022507 | 0.0278969 | 0.0367435 |
| chr2       | 0.0232660 | 0.0022334 | 0.0192682 | 0.0280696 |
| chr3       | 0.0768428 | 0.0012293 | 0.0744677 | 0.0792871 |
| chr4       | 0.0210894 | 0.0015773 | 0.0182098 | 0.0244130 |
| chr6       | 0.0195011 | 0.0018328 | 0.0162151 | 0.0234370 |
| chr7       | 0.0177845 | 0.0014249 | 0.0151967 | 0.0208037 |
| chr8       | 0.0218965 | 0.0019687 | 0.0183528 | 0.0261063 |
| chr9       | 0.0194473 | 0.0025507 | 0.0150298 | 0.0251300 |



| chromosome | prob      | SE        | lower     | upper     |
|------------|-----------|-----------|-----------|-----------|
| chr10      | 0.0104535 | 0.0013206 | 0.0081583 | 0.0133859 |
| chr11      | 0.0144050 | 0.0015245 | 0.0117031 | 0.0177194 |
| chr12      | 0.0163966 | 0.0017638 | 0.0132751 | 0.0202370 |
| chr15      | 0.0152121 | 0.0013897 | 0.0127153 | 0.0181901 |
| chr16      | 0.0279056 | 0.0028842 | 0.0227758 | 0.0341502 |
| chr17      | 0.0245989 | 0.0015274 | 0.0217764 | 0.0277769 |
| chr18      | 0.0162602 | 0.0022808 | 0.0123447 | 0.0213906 |
| chr20      | 0.0167478 | 0.0017908 | 0.0135766 | 0.0206443 |
| chrX       | 0.0034542 | 0.0017241 | 0.0012970 | 0.0091663 |

Code

Proportion of missegregation by chromosome - NT

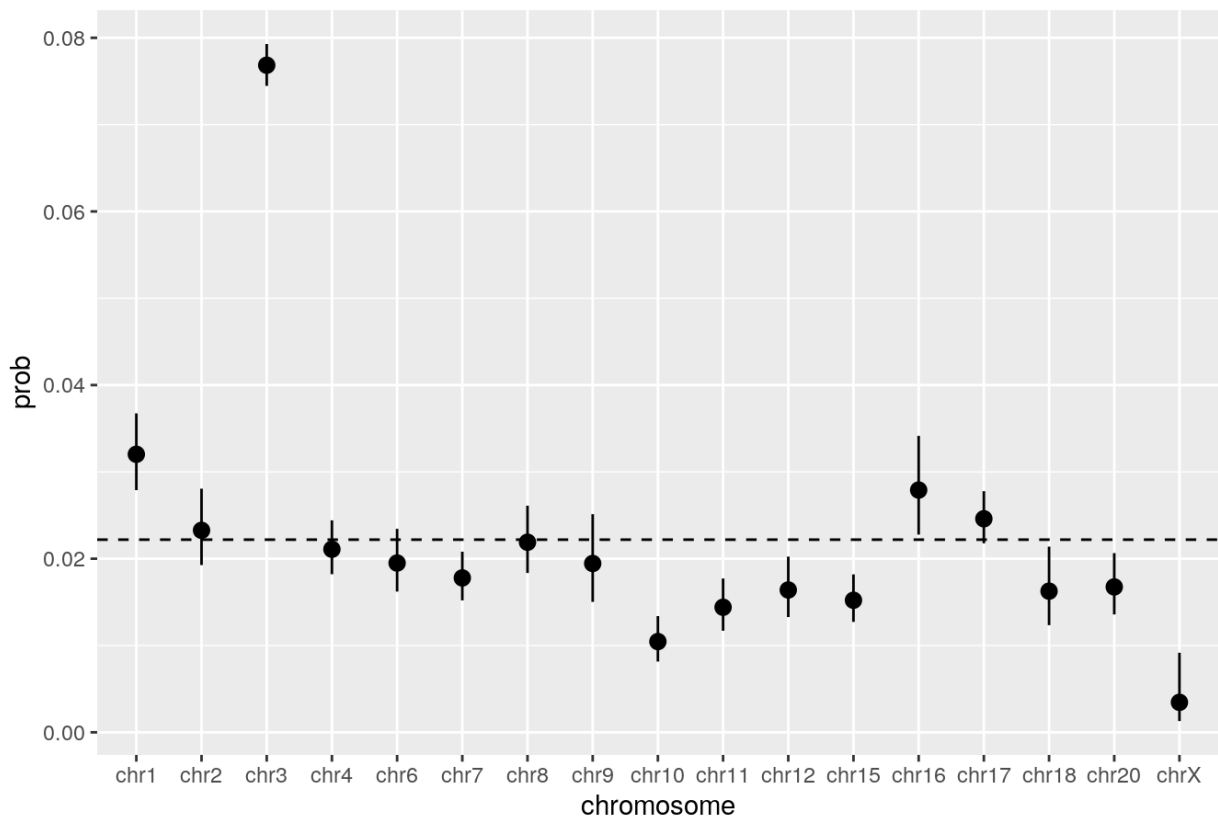

Each estimated coefficients is tested against the mean value (0.0221934).

Code

| chr  | statistic  | p.value   | adj_p.value |
|------|------------|-----------|-------------|
| chr1 | 26.9458231 | 0.0000002 | 0.0000012   |
| chr2 | 0.2415059  | 0.6231206 | 0.6620656   |

| <b>chr</b> | <b>statistic</b> | <b>p.value</b> | <b>adj_p.value</b> |
|------------|------------------|----------------|--------------------|
| chr3       | 5622.9066511     | 0.0000000      | 0.0000000          |
| chr4       | 0.4659198        | 0.4948703      | 0.5608530          |
| chr6       | 1.8985907        | 0.1682362      | 0.2200011          |
| chr7       | 7.6733545        | 0.0056042      | 0.0119090          |
| chr8       | 0.0224460        | 0.8809066      | 0.8809066          |
| chr9       | 1.0169818        | 0.3132360      | 0.3803580          |
| chr10      | 35.8847170       | 0.0000000      | 0.0000000          |
| chr11      | 16.8031601       | 0.0000415      | 0.0001410          |
| chr12      | 7.9637519        | 0.0047723      | 0.0115900          |
| chr15      | 17.2083608       | 0.0000335      | 0.0001410          |
| chr16      | 4.8806730        | 0.0271590      | 0.0419730          |
| chr17      | 2.7400127        | 0.0978640      | 0.1386407          |
| chr18      | 4.9466750        | 0.0261409      | 0.0419730          |
| chr20      | 6.9690101        | 0.0082933      | 0.0156652          |
| chrX       | 14.0764406       | 0.0001755      | 0.0004973          |

---

## 2 Single cell sequencing

### 2.1 48h\_IAA

Data from single cell sequencing are transformed such that mis-segregation is defined as a number of chromosome different from 2 (partial events 1.5 and 2.5 are considered as normal).

Code

Code

Proportion of mis-segregation by chromosome (all cells)

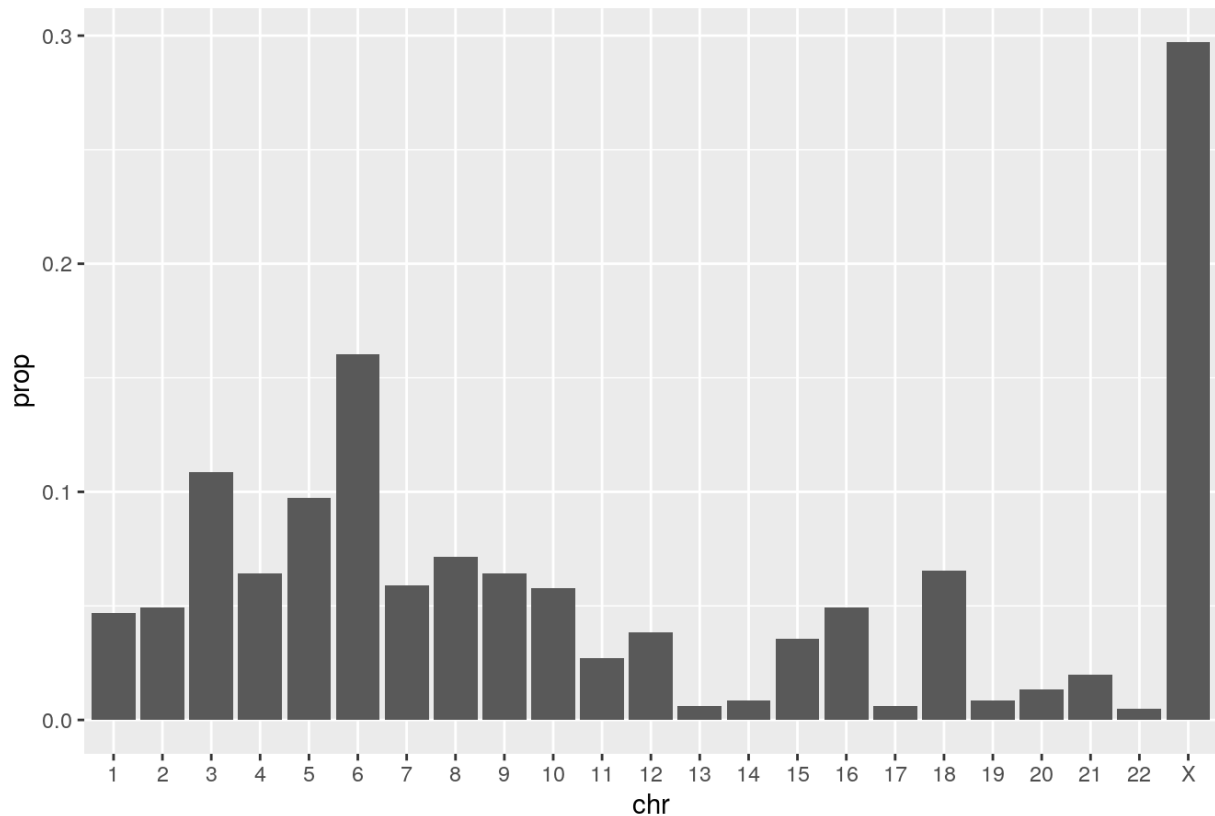

## 2.1.1 Model on missegregated chromosomes only

Code

In this part we only consider chromosomes showing missegregations (1103 events).

A chi-square test allows to see if the probability is the same for each chromosome. With a pvalue of  $2.271322910^{-249}$ , we conclude that the probability proportion of each chromosomes amongst all missegregated chromosome is not the same.

Next a multinomial model is fitted on chromosomes that show missegregation. This model allow to estimate the proportion of each chromosome. For each chromosome, the proportion, its standard error and a confidence interval at 95% is estimated.

Code

Code

| chr | prob      | SE        | lower     | upper     |
|-----|-----------|-----------|-----------|-----------|
| 1   | 0.0344484 | 0.0054914 | 0.0230599 | 0.0458369 |
| 2   | 0.0362694 | 0.0056294 | 0.0245948 | 0.0479440 |
| 3   | 0.0797820 | 0.0081585 | 0.0628623 | 0.0967016 |
| 4   | 0.0471448 | 0.0063818 | 0.0339097 | 0.0603798 |
| 5   | 0.0716217 | 0.0077642 | 0.0555197 | 0.0877236 |
| 6   | 0.1178665 | 0.0097090 | 0.0977313 | 0.1380017 |
| 7   | 0.0435179 | 0.0061431 | 0.0307780 | 0.0562578 |

| <b>chr</b> | <b>prob</b> | <b>SE</b> | <b>lower</b> | <b>upper</b> |
|------------|-------------|-----------|--------------|--------------|
| 8          | 0.0525858   | 0.0067207 | 0.0386479    | 0.0665237    |
| 9          | 0.0471425   | 0.0063816 | 0.0339077    | 0.0603772    |
| 10         | 0.0426114   | 0.0060816 | 0.0299989    | 0.0552239    |
| 11         | 0.0199468   | 0.0042099 | 0.0112160    | 0.0286776    |
| 12         | 0.0281045   | 0.0049763 | 0.0177842    | 0.0384248    |
| 13         | 0.0045336   | 0.0020228 | 0.0003386    | 0.0087285    |
| 14         | 0.0063474   | 0.0023913 | 0.0013882    | 0.0113065    |
| 15         | 0.0262921   | 0.0048177 | 0.0163008    | 0.0362834    |
| 16         | 0.0362581   | 0.0056285 | 0.0245852    | 0.0479310    |
| 17         | 0.0045336   | 0.0020228 | 0.0003386    | 0.0087285    |
| 18         | 0.0480511   | 0.0064398 | 0.0346959    | 0.0614064    |
| 19         | 0.0063474   | 0.0023913 | 0.0013882    | 0.0113065    |
| 20         | 0.0099739   | 0.0029920 | 0.0037688    | 0.0161790    |
| 21         | 0.0145065   | 0.0036002 | 0.0070403    | 0.0219728    |
| 22         | 0.0036267   | 0.0018100 | -0.0001270   | 0.0073805    |
| X          | 0.2184882   | 0.0124421 | 0.1926848    | 0.2442915    |

Code

### Proportion of mis-segregation by chromosome

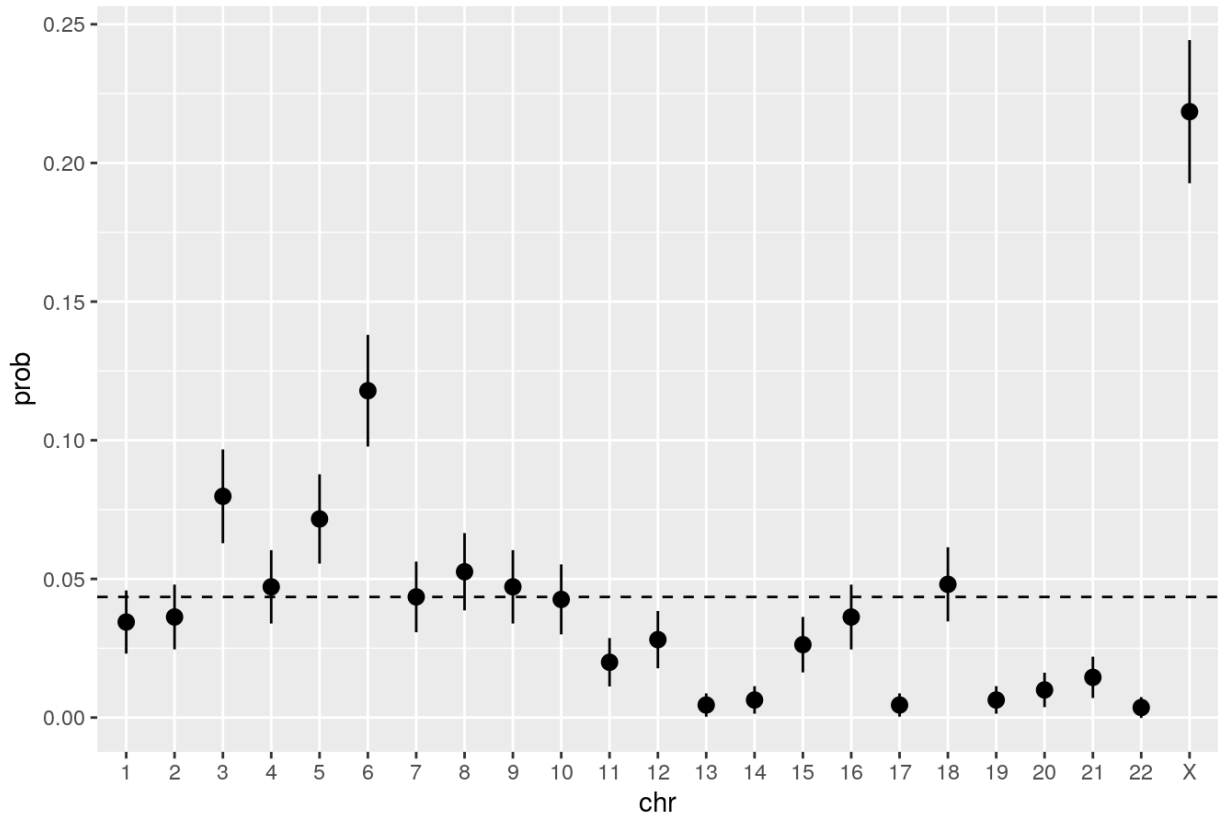

Test against value of 4.35% (1/23). The proportion for each chromosome is compared to 1/23 with a unilateral binomial test (we test if the proportion is over 1/23).

Code

| chr | n   | prop      | pval      |
|-----|-----|-----------|-----------|
| 1   | 38  | 0.0344515 | 0.9222989 |
| 2   | 40  | 0.0362647 | 0.8658330 |
| 3   | 88  | 0.0797824 | 0.0000000 |
| 4   | 52  | 0.0471442 | 0.2472229 |
| 5   | 79  | 0.0716228 | 0.0000089 |
| 6   | 130 | 0.1178604 | 0.0000000 |
| 7   | 48  | 0.0435177 | 0.4591489 |
| 8   | 58  | 0.0525839 | 0.0631980 |
| 9   | 52  | 0.0471442 | 0.2472229 |
| 10  | 47  | 0.0426111 | 0.5179231 |
| 11  | 22  | 0.0199456 | 0.9999837 |
| 12  | 31  | 0.0281052 | 0.9947977 |
| 13  | 5   | 0.0045331 | 1.0000000 |

| chr | n   | prop      | pval      |
|-----|-----|-----------|-----------|
| 14  | 7   | 0.0063463 | 1.0000000 |
| 15  | 29  | 0.0262919 | 0.9981474 |
| 16  | 40  | 0.0362647 | 0.8658330 |
| 17  | 5   | 0.0045331 | 1.0000000 |
| 18  | 53  | 0.0480508 | 0.2043485 |
| 19  | 7   | 0.0063463 | 1.0000000 |
| 20  | 11  | 0.0099728 | 1.0000000 |
| 21  | 16  | 0.0145059 | 0.9999999 |
| 22  | 4   | 0.0036265 | 1.0000000 |
| X   | 241 | 0.2184950 | 0.0000000 |

## 2.1.2 Model on all chromosomes

In this part we use all the chromosomes, including those from normal cells. We fit a logistic model to assess the probability to be missegregated by chromosome.

Code

The anova table shows a strong effect of the chromosome

Code

| term | df | Deviance | Resid..Df | Resid..Dev | p.value |
|------|----|----------|-----------|------------|---------|
| NULL | NA | NA       | 18653     | 25858.549  | NA      |
| chr  | 23 | 18510.74 | 18630     | 7347.808   | 0       |

Probability of mis-segregation by chromosome with 95% confidence interval:

Code

| chr | prob      | SE        | lower     | upper     |
|-----|-----------|-----------|-----------|-----------|
| 1   | 0.0468557 | 0.0074208 | 0.0342783 | 0.0637434 |
| 2   | 0.0493218 | 0.0076037 | 0.0363812 | 0.0665475 |
| 3   | 0.1085080 | 0.0109214 | 0.0888826 | 0.1318397 |
| 4   | 0.0641184 | 0.0086018 | 0.0491859 | 0.0831877 |
| 5   | 0.0974106 | 0.0104121 | 0.0788235 | 0.1198106 |
| 6   | 0.1602959 | 0.0128829 | 0.1366238 | 0.1871804 |

| <b>chr</b> | <b>prob</b> | <b>SE</b> | <b>lower</b> | <b>upper</b> |
|------------|-------------|-----------|--------------|--------------|
| 7          | 0.0591862   | 0.0082861 | 0.0448855    | 0.0776726    |
| 8          | 0.0715166   | 0.0090486 | 0.0556873    | 0.0914100    |
| 9          | 0.0641184   | 0.0086018 | 0.0491859    | 0.0831877    |
| 10         | 0.0579531   | 0.0082047 | 0.0438151    | 0.0762892    |
| 11         | 0.0271270   | 0.0057045 | 0.0179267    | 0.0408527    |
| 12         | 0.0382244   | 0.0067328 | 0.0270077    | 0.0538418    |
| 13         | 0.0061652   | 0.0027480 | 0.0025690    | 0.0147214    |
| 14         | 0.0086313   | 0.0032481 | 0.0041204    | 0.0179916    |
| 15         | 0.0357583   | 0.0065204 | 0.0249600    | 0.0509839    |
| 16         | 0.0493218   | 0.0076037 | 0.0363812    | 0.0665475    |
| 17         | 0.0061652   | 0.0027480 | 0.0025690    | 0.0147214    |
| 18         | 0.0653514   | 0.0086784 | 0.0502654    | 0.0845621    |
| 19         | 0.0086313   | 0.0032481 | 0.0041204    | 0.0179916    |
| 20         | 0.0135635   | 0.0040617 | 0.0075269    | 0.0243228    |
| 21         | 0.0197287   | 0.0048833 | 0.0121206    | 0.0319579    |
| 22         | 0.0049322   | 0.0024580 | 0.0018539    | 0.0130551    |
| X          | 0.2971640   | 0.0160478 | 0.2666991    | 0.3295450    |

The plot below shows the proportion of mi-segregation by chromosome with a 95% confidence interval (dotted line at mean value).

Code

Code

## Proportion of mis-segregation by chromosome

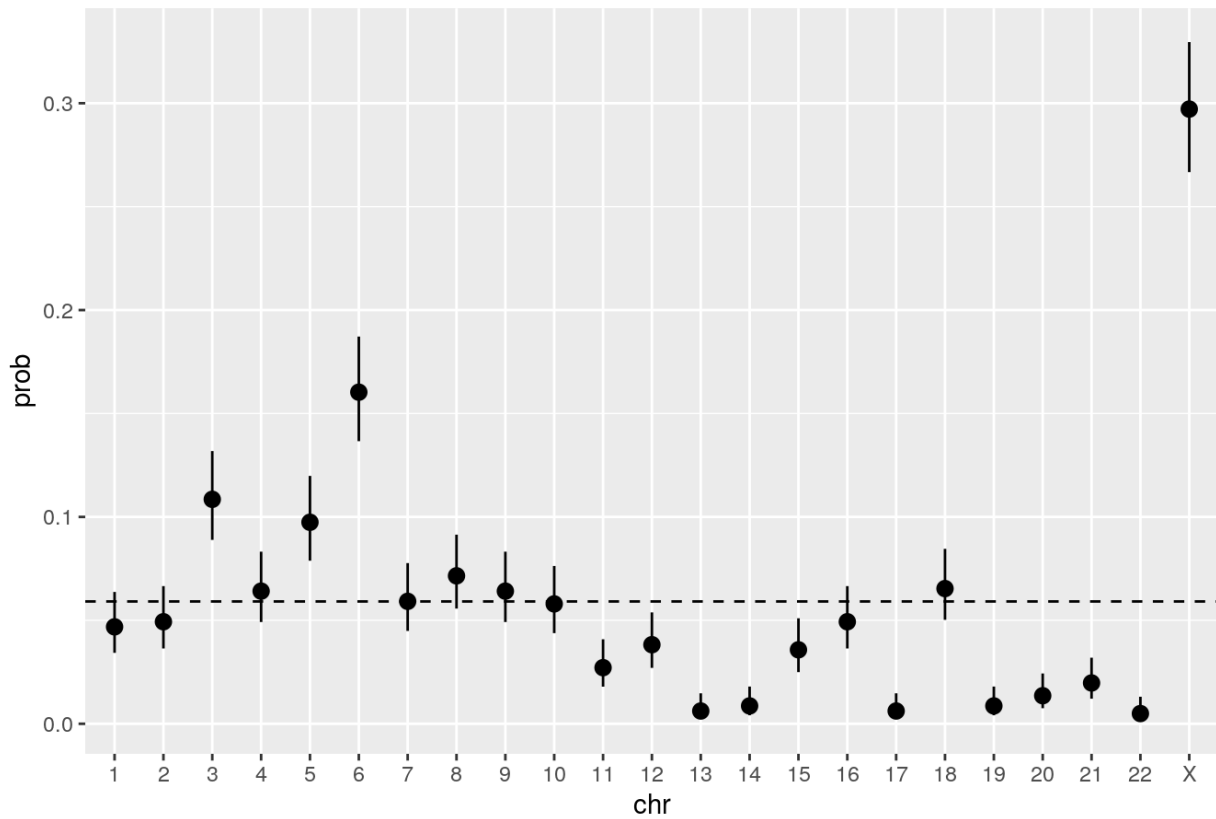

### 2.1.3 Test against mean value.

The coefficients are tested against the mean value of 5.91

Code

| chr | statistic   | p.value   | adj_p.value |
|-----|-------------|-----------|-------------|
| 1   | 2.1860293   | 0.1392679 | 0.2001976   |
| 2   | 1.3987485   | 0.2369332 | 0.3027480   |
| 3   | 34.2716041  | 0.0000000 | 0.0000000   |
| 4   | 0.3621302   | 0.5473255 | 0.5994518   |
| 5   | 20.8453909  | 0.0000050 | 0.0000115   |
| 6   | 134.7385114 | 0.0000000 | 0.0000000   |
| 7   | 0.0000419   | 0.9948356 | 0.9948356   |
| 8   | 2.2278986   | 0.1355381 | 0.2001976   |
| 9   | 0.3621302   | 0.5473255 | 0.5994518   |
| 10  | 0.0202767   | 0.8867670 | 0.9270746   |
| 11  | 14.1365445  | 0.0001700 | 0.0003259   |
| 12  | 6.2619500   | 0.0123358 | 0.0202660   |



| chr | statistic   | p.value   | adj_p.value |
|-----|-------------|-----------|-------------|
| 13  | 26.6584328  | 0.0000002 | 0.0000008   |
| 14  | 27.1158843  | 0.0000002 | 0.0000008   |
| 15  | 7.7820239   | 0.0052769 | 0.0093360   |
| 16  | 1.3987485   | 0.2369332 | 0.3027480   |
| 17  | 26.6584328  | 0.0000002 | 0.0000008   |
| 18  | 0.5632130   | 0.4529685 | 0.5483303   |
| 19  | 27.1158843  | 0.0000002 | 0.0000008   |
| 20  | 25.0596959  | 0.0000006 | 0.0000014   |
| 21  | 20.3380925  | 0.0000065 | 0.0000136   |
| 22  | 25.7217714  | 0.0000004 | 0.0000011   |
| X   | 615.4591244 | 0.0000000 | 0.0000000   |

## 2.2 NT

Data from single cell sequencing are transformed such that mis-segregation is defined as a number of chromosome different from 2 (partial events 1.5 and 2.5 are considered as normal).

Code

Code

Proportion of mis-segregation by chromosome (all cells)

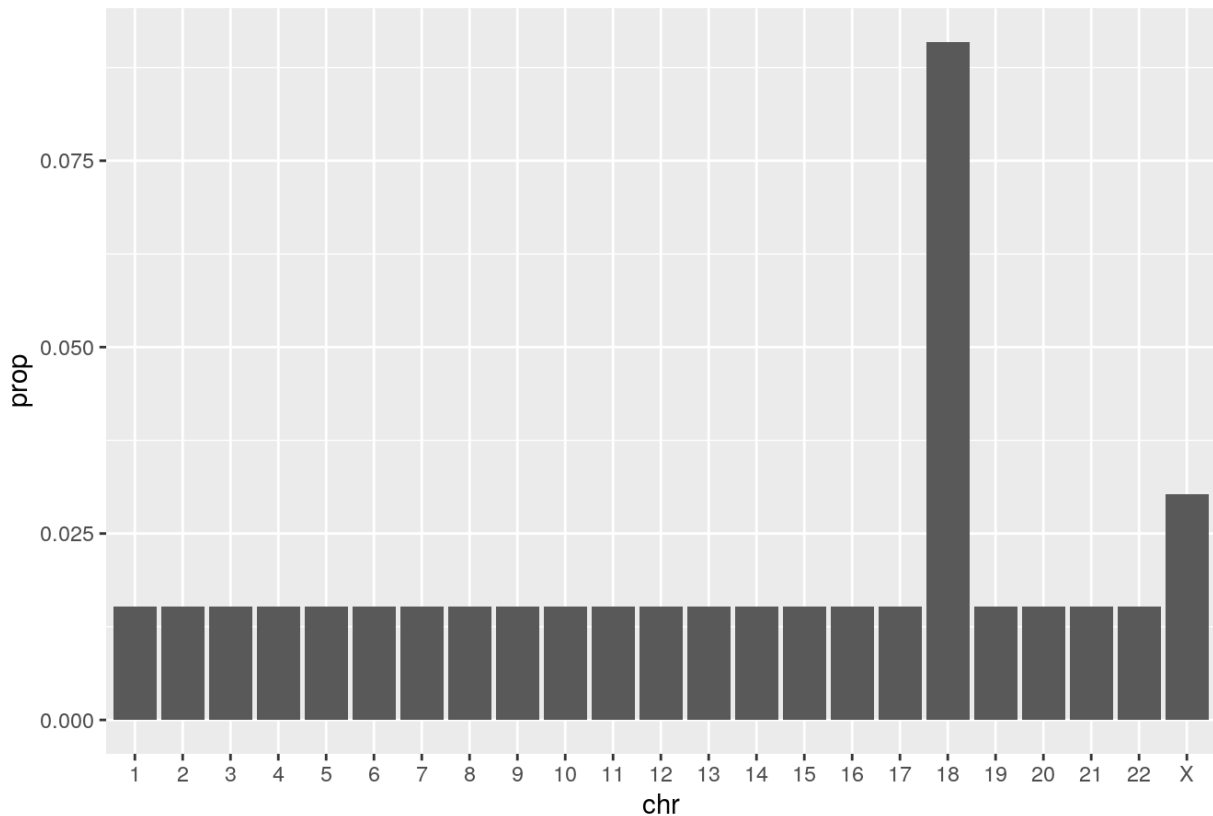

## 2.2.1 Model on missegregated chromosomes only

[Code](#)

In this part we only consider chromosomes showing missegregations (29 events).

A chi-square test allows to see if the probability is the same for each chromosome. With a pvalue of 0.6218038, we conclude that the probability proportion of each chromosomes amongst all missegregated chromosome is not the same.

Next a multinomial model is fitted on chromosomes that show missegregation. This model allow to estimate the proportion of each chromosome. For each chromosome, the proportion, its standard error and a confidence interval at 95% is estimated.

[Code](#)

[Code](#)

| chr | prob      | SE        | lower      | upper     |
|-----|-----------|-----------|------------|-----------|
| 1   | 0.0344807 | 0.0338820 | -0.0357863 | 0.1047477 |
| 2   | 0.0344829 | 0.0338831 | -0.0357863 | 0.1047520 |
| 3   | 0.0344829 | 0.0338831 | -0.0357863 | 0.1047520 |
| 4   | 0.0344829 | 0.0338831 | -0.0357863 | 0.1047520 |
| 5   | 0.0344829 | 0.0338831 | -0.0357863 | 0.1047520 |
| 6   | 0.0344829 | 0.0338831 | -0.0357863 | 0.1047520 |
| 7   | 0.0344829 | 0.0338831 | -0.0357863 | 0.1047520 |

| <b>chr</b> | <b>prob</b> | <b>SE</b> | <b>lower</b> | <b>upper</b> |
|------------|-------------|-----------|--------------|--------------|
| 8          | 0.0344829   | 0.0338831 | -0.0357863   | 0.1047520    |
| 9          | 0.0344829   | 0.0338831 | -0.0357863   | 0.1047520    |
| 10         | 0.0344829   | 0.0338831 | -0.0357863   | 0.1047520    |
| 11         | 0.0344829   | 0.0338831 | -0.0357863   | 0.1047520    |
| 12         | 0.0344829   | 0.0338831 | -0.0357863   | 0.1047520    |
| 13         | 0.0344829   | 0.0338831 | -0.0357863   | 0.1047520    |
| 14         | 0.0344829   | 0.0338831 | -0.0357863   | 0.1047520    |
| 15         | 0.0344829   | 0.0338831 | -0.0357863   | 0.1047520    |
| 16         | 0.0344829   | 0.0338831 | -0.0357863   | 0.1047520    |
| 17         | 0.0344829   | 0.0338831 | -0.0357863   | 0.1047520    |
| 18         | 0.2068966   | 0.0752216 | 0.0508965    | 0.3628967    |
| 19         | 0.0344829   | 0.0338831 | -0.0357863   | 0.1047520    |
| 20         | 0.0344829   | 0.0338831 | -0.0357863   | 0.1047520    |
| 21         | 0.0344829   | 0.0338831 | -0.0357863   | 0.1047520    |
| 22         | 0.0344829   | 0.0338831 | -0.0357863   | 0.1047520    |
| X          | 0.0689656   | 0.0470544 | -0.0286192   | 0.1665504    |

Code

## Proportion of mis-segregation by chromosome

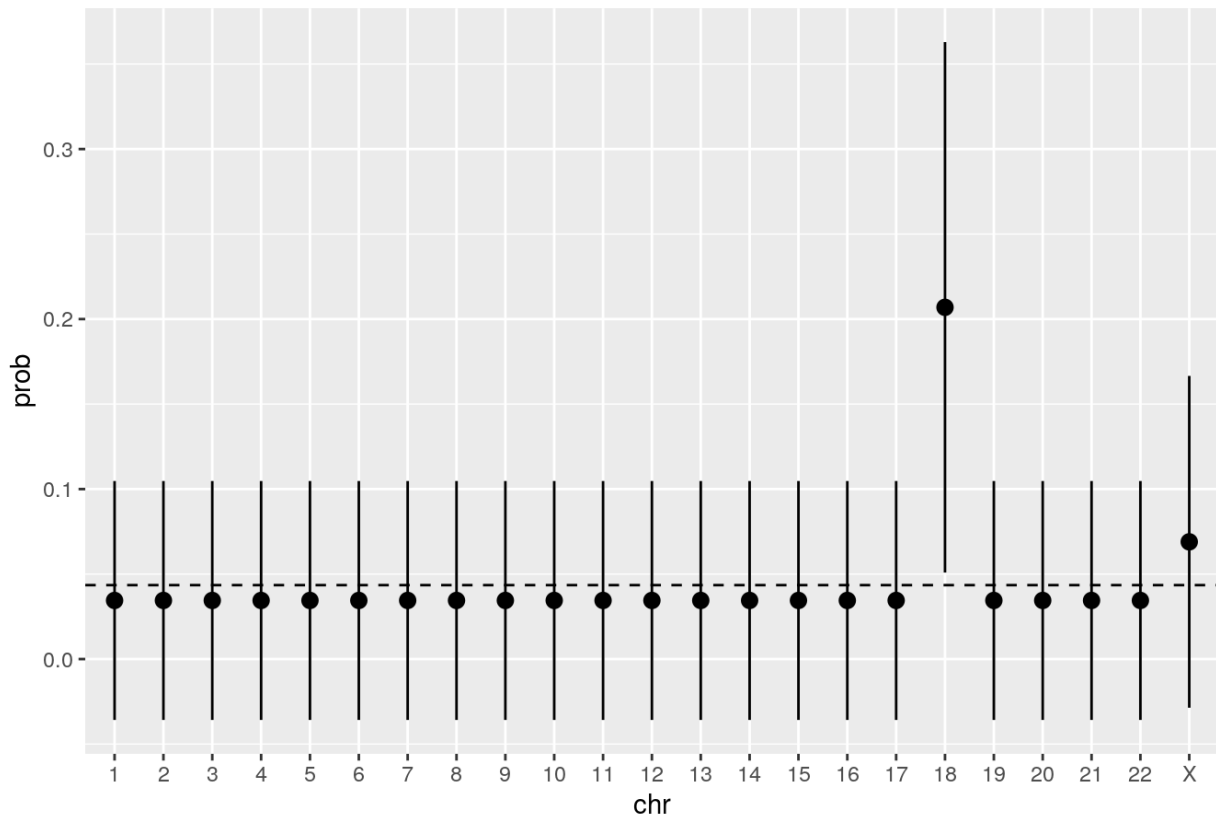

Test against value of 4.35% (1/23). The proportion for each chromosome is compared to 1/23 with a unilateral binomial test (we test if the proportion is over 1/23).

Code

| chr | n | prop      | pval      |
|-----|---|-----------|-----------|
| 1   | 1 | 0.0344828 | 0.3612984 |
| 2   | 1 | 0.0344828 | 0.3612984 |
| 3   | 1 | 0.0344828 | 0.3612984 |
| 4   | 1 | 0.0344828 | 0.3612984 |
| 5   | 1 | 0.0344828 | 0.3612984 |
| 6   | 1 | 0.0344828 | 0.3612984 |
| 7   | 1 | 0.0344828 | 0.3612984 |
| 8   | 1 | 0.0344828 | 0.3612984 |
| 9   | 1 | 0.0344828 | 0.3612984 |
| 10  | 1 | 0.0344828 | 0.3612984 |
| 11  | 1 | 0.0344828 | 0.3612984 |
| 12  | 1 | 0.0344828 | 0.3612984 |
| 13  | 1 | 0.0344828 | 0.3612984 |

| chr | n | prop      | pval      |
|-----|---|-----------|-----------|
| 14  | 1 | 0.0344828 | 0.3612984 |
| 15  | 1 | 0.0344828 | 0.3612984 |
| 16  | 1 | 0.0344828 | 0.3612984 |
| 17  | 1 | 0.0344828 | 0.3612984 |
| 18  | 6 | 0.2068966 | 0.0001965 |
| 19  | 1 | 0.0344828 | 0.3612984 |
| 20  | 1 | 0.0344828 | 0.3612984 |
| 21  | 1 | 0.0344828 | 0.3612984 |
| 22  | 1 | 0.0344828 | 0.3612984 |
| X   | 2 | 0.0689655 | 0.1301818 |

## 2.2.2 Model on all chromosomes

In this part we use all the chromosomes, including those from normal cells. We fit a logistic model to assess the probability to be missegregated by chromosome.

Code

The anova table shows a strong effect of the chromosome

Code

| term | df | Deviance | Resid..Df | Resid..Dev | p.value |
|------|----|----------|-----------|------------|---------|
| NULL | NA | NA       | 1518      | 2104.3948  | NA      |
| chr  | 23 | 1828.612 | 1495      | 275.7825   | 0       |

Probability of mis-segregation by chromosome with 95% confidence interval:

Code

| chr | prob      | SE        | lower     | upper     |
|-----|-----------|-----------|-----------|-----------|
| 1   | 0.0151515 | 0.0150363 | 0.0021303 | 0.0998040 |
| 2   | 0.0151515 | 0.0150363 | 0.0021303 | 0.0998040 |
| 3   | 0.0151515 | 0.0150363 | 0.0021303 | 0.0998040 |
| 4   | 0.0151515 | 0.0150363 | 0.0021303 | 0.0998040 |
| 5   | 0.0151515 | 0.0150363 | 0.0021303 | 0.0998040 |
| 6   | 0.0151515 | 0.0150363 | 0.0021303 | 0.0998040 |

| <b>chr</b> | <b>prob</b> | <b>SE</b> | <b>lower</b> | <b>upper</b> |
|------------|-------------|-----------|--------------|--------------|
| 7          | 0.0151515   | 0.0150363 | 0.0021303    | 0.0998040    |
| 8          | 0.0151515   | 0.0150363 | 0.0021303    | 0.0998040    |
| 9          | 0.0151515   | 0.0150363 | 0.0021303    | 0.0998040    |
| 10         | 0.0151515   | 0.0150363 | 0.0021303    | 0.0998040    |
| 11         | 0.0151515   | 0.0150363 | 0.0021303    | 0.0998040    |
| 12         | 0.0151515   | 0.0150363 | 0.0021303    | 0.0998040    |
| 13         | 0.0151515   | 0.0150363 | 0.0021303    | 0.0998040    |
| 14         | 0.0151515   | 0.0150363 | 0.0021303    | 0.0998040    |
| 15         | 0.0151515   | 0.0150363 | 0.0021303    | 0.0998040    |
| 16         | 0.0151515   | 0.0150363 | 0.0021303    | 0.0998040    |
| 17         | 0.0151515   | 0.0150363 | 0.0021303    | 0.0998040    |
| 18         | 0.0909091   | 0.0353863 | 0.0414159    | 0.1879511    |
| 19         | 0.0151515   | 0.0150363 | 0.0021303    | 0.0998040    |
| 20         | 0.0151515   | 0.0150363 | 0.0021303    | 0.0998040    |
| 21         | 0.0151515   | 0.0150363 | 0.0021303    | 0.0998040    |
| 22         | 0.0151515   | 0.0150363 | 0.0021303    | 0.0998040    |
| X          | 0.0303030   | 0.0211003 | 0.0075913    | 0.1132120    |

The plot below shows the proportion of mi-segregation by chromosome with a 95% confidence interval (dotted line at mean value).

Code

Code

## Proportion of mis-segregation by chromosome

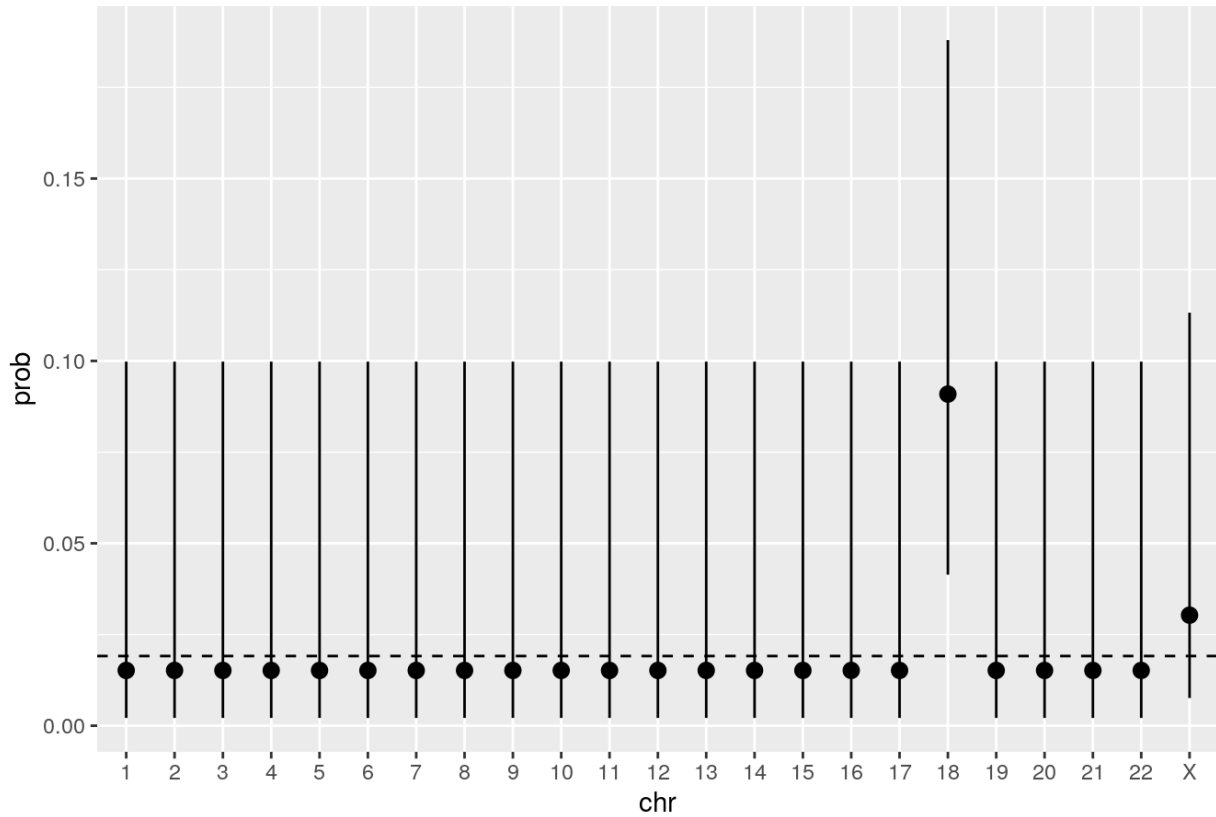

### 2.2.3 Test against mean value.

The coefficients are tested against the mean value of 1.91

Code

| chr | statistic | p.value   | adj_p.value |
|-----|-----------|-----------|-------------|
| 1   | 0.0547699 | 0.8149619 | 0.8149619   |
| 2   | 0.0547699 | 0.8149619 | 0.8149619   |
| 3   | 0.0547699 | 0.8149619 | 0.8149619   |
| 4   | 0.0547699 | 0.8149619 | 0.8149619   |
| 5   | 0.0547699 | 0.8149619 | 0.8149619   |
| 6   | 0.0547699 | 0.8149619 | 0.8149619   |
| 7   | 0.0547699 | 0.8149619 | 0.8149619   |
| 8   | 0.0547699 | 0.8149619 | 0.8149619   |
| 9   | 0.0547699 | 0.8149619 | 0.8149619   |
| 10  | 0.0547699 | 0.8149619 | 0.8149619   |
| 11  | 0.0547699 | 0.8149619 | 0.8149619   |
| 12  | 0.0547699 | 0.8149619 | 0.8149619   |

| chr | statistic  | p.value   | adj_p.value |
|-----|------------|-----------|-------------|
| 13  | 0.0547699  | 0.8149619 | 0.8149619   |
| 14  | 0.0547699  | 0.8149619 | 0.8149619   |
| 15  | 0.0547699  | 0.8149619 | 0.8149619   |
| 16  | 0.0547699  | 0.8149619 | 0.8149619   |
| 17  | 0.0547699  | 0.8149619 | 0.8149619   |
| 18  | 14.5986963 | 0.0001330 | 0.0030592   |
| 19  | 0.0547699  | 0.8149619 | 0.8149619   |
| 20  | 0.0547699  | 0.8149619 | 0.8149619   |
| 21  | 0.0547699  | 0.8149619 | 0.8149619   |
| 22  | 0.0547699  | 0.8149619 | 0.8149619   |
| X   | 0.4335837  | 0.5102357 | 0.8149619   |

---

## 3 FISH data

FISH data are analysed in the same way as Image stream.

Code

### 3.1 Analysis of NT and 48h\_IAA data

Code

Code



### Losses

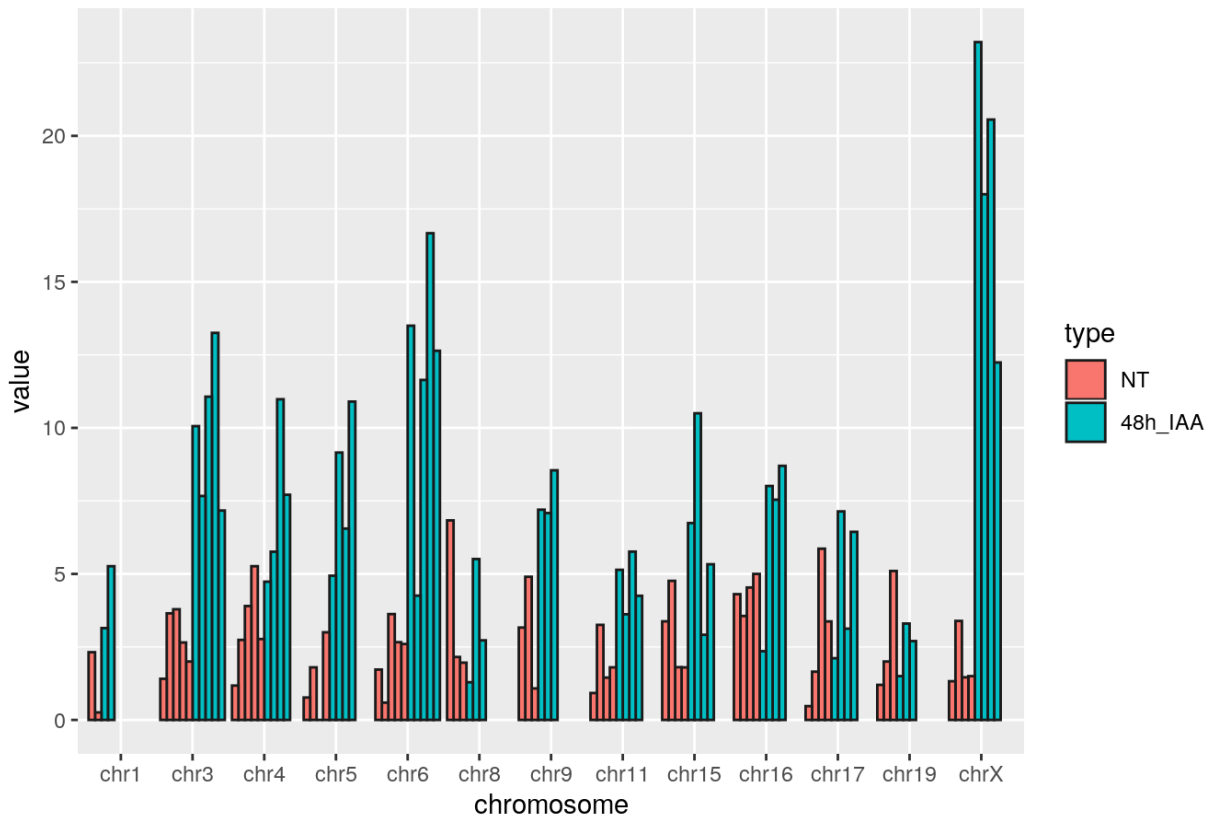

Code

### Gains

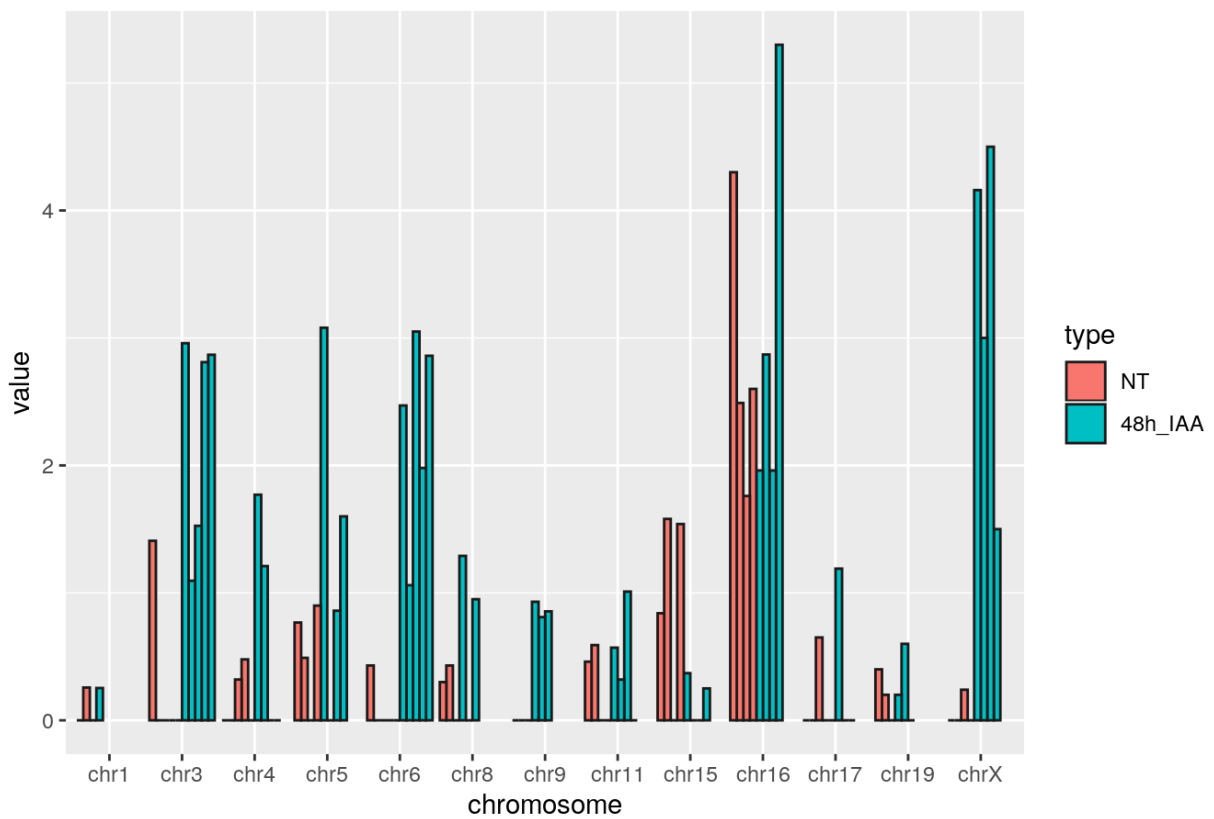

## 3.1.1 Model

A generalized linear model is fitted between gains or losses fractions according to chromosomes and type (control or 48h\_IAA) with a binomial family.

## 3.1.2 Results

### 3.1.2.1 Losses

#### 3.1.2.1.1 Estimated proportions for each chromosome

The following table gives the estimated probability for each chromosome with standard error and confidence interval at 95%.

| <b>type</b> | <b>chromosome</b> | <b>prob</b> | <b>SE</b> | <b>lower</b> | <b>upper</b> |
|-------------|-------------------|-------------|-----------|--------------|--------------|
| NT          | chr1              | 0.0160226   | 0.0038548 | 0.0099832    | 0.0256211    |
| 48h_IAA     | chr1              | 0.0432900   | 0.0077307 | 0.0304300    | 0.0612415    |
| NT          | chr3              | 0.0279931   | 0.0034232 | 0.0220104    | 0.0355429    |
| 48h_IAA     | chr3              | 0.0904075   | 0.0059080 | 0.0794766    | 0.1026741    |
| NT          | chr4              | 0.0349170   | 0.0043919 | 0.0272602    | 0.0446257    |
| 48h_IAA     | chr4              | 0.0749814   | 0.0071758 | 0.0620738    | 0.0903146    |
| NT          | chr5              | 0.0124224   | 0.0025199 | 0.0083398    | 0.0184662    |
| 48h_IAA     | chr5              | 0.0714286   | 0.0070993 | 0.0587048    | 0.0866562    |
| NT          | chr6              | 0.0257048   | 0.0032223 | 0.0200905    | 0.0328355    |
| 48h_IAA     | chr6              | 0.1258081   | 0.0073952 | 0.1120139    | 0.1410311    |
| NT          | chr8              | 0.0382022   | 0.0064253 | 0.0274208    | 0.0529919    |
| 48h_IAA     | chr8              | 0.0334661   | 0.0050768 | 0.0248241    | 0.0449780    |
| NT          | chr9              | 0.0365169   | 0.0049707 | 0.0279312    | 0.0476123    |
| 48h_IAA     | chr9              | 0.0744804   | 0.0063087 | 0.0630209    | 0.0878282    |
| NT          | chr11             | 0.0187683   | 0.0032865 | 0.0133025    | 0.0264199    |
| 48h_IAA     | chr11             | 0.0438175   | 0.0050148 | 0.0349754    | 0.0547682    |
| NT          | chr15             | 0.0252672   | 0.0048923 | 0.0172595    | 0.0368511    |
| 48h_IAA     | chr15             | 0.0574810   | 0.0067673 | 0.0455675    | 0.0722734    |
| NT          | chr16             | 0.0444096   | 0.0047087 | 0.0360426    | 0.0546089    |
| 48h_IAA     | chr16             | 0.0735450   | 0.0060042 | 0.0626095    | 0.0862148    |
| NT          | chr17             | 0.0316319   | 0.0046927 | 0.0236211    | 0.0422419    |

| type    | chromosome | prob      | SE        | lower     | upper     |
|---------|------------|-----------|-----------|-----------|-----------|
| 48h_IAA | chr17      | 0.0497367 | 0.0052588 | 0.0403849 | 0.0611161 |
| NT      | chr19      | 0.0221551 | 0.0033028 | 0.0165271 | 0.0296418 |
| 48h_IAA | chr19      | 0.0257009 | 0.0034207 | 0.0197833 | 0.0333285 |
| NT      | chrX       | 0.0169492 | 0.0033610 | 0.0114778 | 0.0249629 |
| 48h_IAA | chrX       | 0.1641921 | 0.0109478 | 0.1438447 | 0.1867899 |

### 3.1.2.1.2 Anova

Anova table on losses model:

Code

| term            | df | Deviance | Resid..Df | Resid..Dev | p.value |
|-----------------|----|----------|-----------|------------|---------|
| NULL            | NA | NA       | 98        | 1142.4348  | NA      |
| type            | 1  | 469.4442 | 97        | 672.9906   | 0       |
| chromosome      | 12 | 278.4129 | 85        | 394.5777   | 0       |
| type:chromosome | 12 | 160.5050 | 73        | 234.0727   | 0       |

Code

### 3.1.2.1.3 Comparison of NT and 48h\_IAA

Comparison of missegregation rate for each chromosome between NT and 48h\_IAA

Code

| chr   | statistic | p.value   | adj_p.value |
|-------|-----------|-----------|-------------|
| chr1  | 11.038887 | 0.0008922 | 0.0010544   |
| chr3  | 50.386352 | 0.0000000 | 0.0000000   |
| chr4  | 36.548455 | 0.0000000 | 0.0000000   |
| chr5  | 33.840479 | 0.0000000 | 0.0000000   |
| chr6  | 73.842801 | 0.0000000 | 0.0000000   |
| chr8  | 6.742240  | 0.0094156 | 0.0102003   |
| chr9  | 37.456177 | 0.0000000 | 0.0000000   |
| chr11 | 14.446210 | 0.0001442 | 0.0001875   |
| chr15 | 23.131114 | 0.0000015 | 0.0000025   |

| chr   | statistic | p.value   | adj_p.value |
|-------|-----------|-----------|-------------|
| chr16 | 37.151724 | 0.0000000 | 0.0000000   |
| chr17 | 18.892279 | 0.0000138 | 0.0000200   |
| chr19 | 2.966745  | 0.0849927 | 0.0849927   |
| chrX  | 93.752389 | 0.0000000 | 0.0000000   |

### 3.1.2.2 Gains

#### 3.1.2.2.1 Estimated proportions for each chromosome

The following table gives the estimated probability for each chromosome with standard error and confidence interval at 95%.

Code

| type    | chromosome | prob      | SE        | lower     | upper     |
|---------|------------|-----------|-----------|-----------|-----------|
| NT      | chr1       | 0.0009425 | 0.0009421 | 0.0001327 | 0.0066588 |
| 48h_IAA | chr1       | 0.0014430 | 0.0014420 | 0.0002032 | 0.0101688 |
| NT      | chr3       | 0.0012920 | 0.0007454 | 0.0004168 | 0.0039980 |
| 48h_IAA | chr3       | 0.0207980 | 0.0029401 | 0.0157532 | 0.0274133 |
| NT      | chr4       | 0.0022896 | 0.0011435 | 0.0008596 | 0.0060842 |
| 48h_IAA | chr4       | 0.0051967 | 0.0019591 | 0.0024794 | 0.0108596 |
| NT      | chr5       | 0.0046584 | 0.0015492 | 0.0024256 | 0.0089282 |
| 48h_IAA | chr5       | 0.0129179 | 0.0031128 | 0.0080452 | 0.0206803 |
| NT      | chr6       | 0.0008292 | 0.0005861 | 0.0002074 | 0.0033091 |
| 48h_IAA | chr6       | 0.0263550 | 0.0035721 | 0.0201889 | 0.0343385 |
| NT      | chr8       | 0.0033708 | 0.0019428 | 0.0010876 | 0.0103975 |
| 48h_IAA | chr8       | 0.0071713 | 0.0023819 | 0.0037354 | 0.0137240 |
| NT      | chr9       | 0.0000000 | 0.0000002 | 0.0000000 | 1.0000000 |
| 48h_IAA | chr9       | 0.0086605 | 0.0022264 | 0.0052277 | 0.0143152 |
| NT      | chr11      | 0.0017595 | 0.0010150 | 0.0005676 | 0.0054408 |
| 48h_IAA | chr11      | 0.0036014 | 0.0014676 | 0.0016189 | 0.0079926 |
| NT      | chr15      | 0.0097182 | 0.0030582 | 0.0052367 | 0.0179657 |
| 48h_IAA | chr15      | 0.0016906 | 0.0011944 | 0.0004229 | 0.0067336 |

| type    | chromosome | prob      | SE        | lower     | upper     |
|---------|------------|-----------|-----------|-----------|-----------|
| NT      | chr16      | 0.0261233 | 0.0036458 | 0.0198533 | 0.0343041 |
| 48h_IAA | chr16      | 0.0317460 | 0.0040328 | 0.0247258 | 0.0406763 |
| NT      | chr17      | 0.0007189 | 0.0007186 | 0.0001013 | 0.0050849 |
| 48h_IAA | chr17      | 0.0011703 | 0.0008270 | 0.0002927 | 0.0046667 |
| NT      | chr19      | 0.0025176 | 0.0011245 | 0.0010483 | 0.0060340 |
| 48h_IAA | chr19      | 0.0028037 | 0.0011430 | 0.0012601 | 0.0062264 |
| NT      | chrX       | 0.0006780 | 0.0006777 | 0.0000955 | 0.0047963 |
| 48h_IAA | chrX       | 0.0279476 | 0.0048710 | 0.0198306 | 0.0392540 |

### 3.1.2.2.2 Anova

Anova table on gains model:

Code

| term            | df | Deviance  | Resid..Df | Resid..Dev | p.value |
|-----------------|----|-----------|-----------|------------|---------|
| NULL            | NA | NA        | 98        | 602.6248   | NA      |
| type            | 1  | 90.40428  | 97        | 512.2205   | 0       |
| chromosome      | 12 | 252.42945 | 85        | 259.7911   | 0       |
| type:chromosome | 12 | 105.54838 | 73        | 154.2427   | 0       |

Code

### 3.1.2.2.3 Comparison of NT and 48h\_IAA

Comparison of missegregation rate for each chromosome between NT and 48h\_IAA

Code

| chr  | statistic  | p.value   | adj_p.value |
|------|------------|-----------|-------------|
| chr1 | 0.0908163  | 0.7631419 | 0.8267371   |
| chr3 | 9.4911115  | 0.0020647 | 0.0067103   |
| chr4 | 2.5593227  | 0.1096456 | 0.1781740   |
| chr5 | 6.5215169  | 0.0106577 | 0.0277100   |
| chr6 | 11.0426055 | 0.0008904 | 0.0038585   |
| chr8 | 3.7232853  | 0.0536587 | 0.0996519   |

| chr   | statistic  | p.value   | adj_p.value |
|-------|------------|-----------|-------------|
| chr9  | 4.6376669  | 0.0312775 | 0.0677679   |
| chr11 | 1.5444238  | 0.2139605 | 0.3090541   |
| chr15 | 0.2279205  | 0.6330700 | 0.7481737   |
| chr16 | 12.3658937 | 0.0004372 | 0.0038585   |
| chr17 | 0.0312679  | 0.8596441 | 0.8596441   |
| chr19 | 1.0209330  | 0.3122978 | 0.4059872   |
| chrX  | 11.3015295 | 0.0007744 | 0.0038585   |

## 3.2 Analysis of 48h\_ IAA data only

### 3.2.1 Model

A generalized linear model is fitted between gains or losses fractions and chromosomes with a quasibinomial family and weights of observation equal to number of cells.

Code

### 3.2.2 Results

#### 3.2.2.1 Losses

##### 3.2.2.1.1 Estimated proportions for each chromosome

The following table gives the estimated probability for each chromosome with standard error and confidence interval at 95%.

Code

Code

| chromosome | prob      | SE        | lower     | upper     |
|------------|-----------|-----------|-----------|-----------|
| chr1       | 0.0432900 | 0.0077307 | 0.0304300 | 0.0612415 |
| chr3       | 0.0904075 | 0.0059080 | 0.0794766 | 0.1026741 |
| chr4       | 0.0749814 | 0.0071758 | 0.0620738 | 0.0903146 |
| chr5       | 0.0714286 | 0.0070993 | 0.0587048 | 0.0866562 |
| chr6       | 0.1258081 | 0.0073952 | 0.1120139 | 0.1410311 |
| chr8       | 0.0334661 | 0.0050768 | 0.0248241 | 0.0449779 |
| chr9       | 0.0744804 | 0.0063087 | 0.0630209 | 0.0878282 |
| chr11      | 0.0438175 | 0.0050148 | 0.0349754 | 0.0547682 |

| chromosome | prob      | SE        | lower     | upper     |
|------------|-----------|-----------|-----------|-----------|
| chr15      | 0.0574810 | 0.0067673 | 0.0455675 | 0.0722734 |
| chr16      | 0.0735450 | 0.0060042 | 0.0626095 | 0.0862148 |
| chr17      | 0.0497367 | 0.0052588 | 0.0403849 | 0.0611161 |
| chr19      | 0.0257009 | 0.0034207 | 0.0197833 | 0.0333285 |
| chrX       | 0.1641921 | 0.0109478 | 0.1438447 | 0.1867899 |

Code

Proportion of loss by chromosome

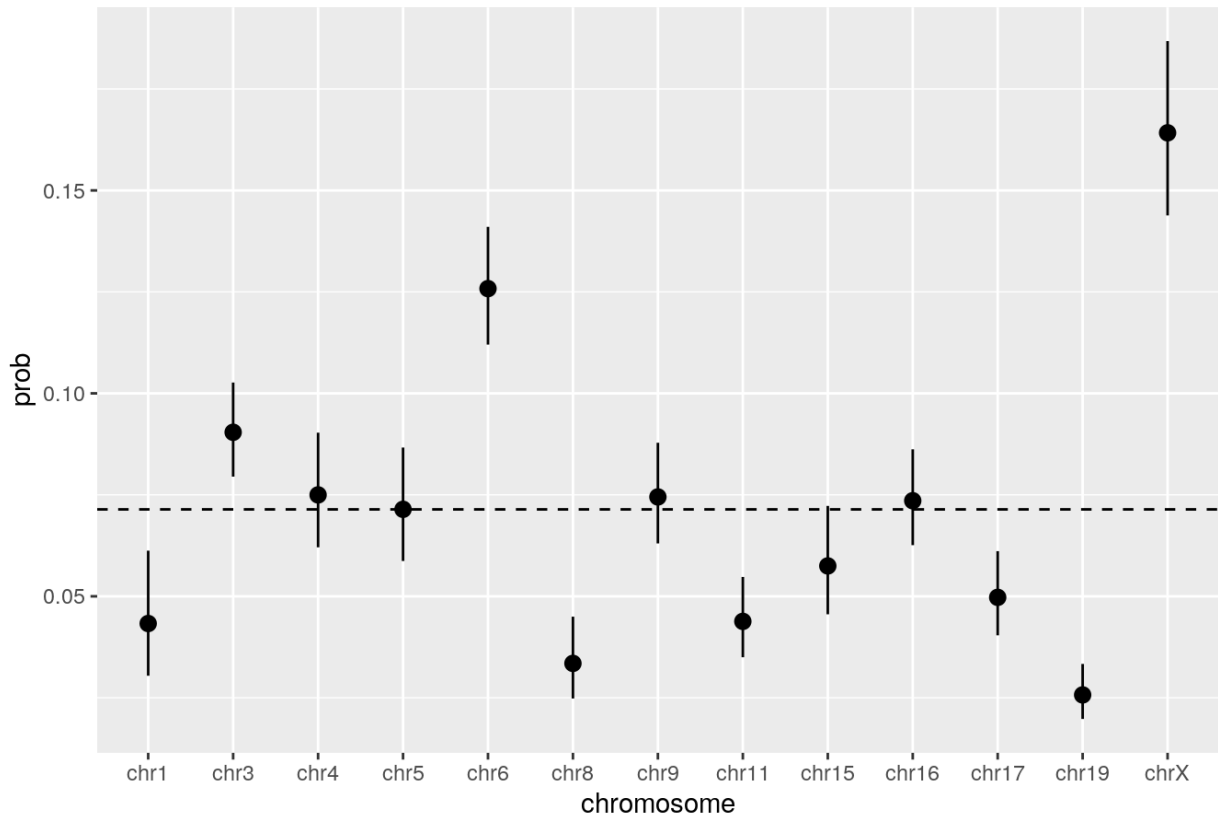

### 3.2.2.1.2 Anova

Anova table on losses model:

Code

| term       | df | Deviance | Resid..Df | Resid..Dev | p.value |
|------------|----|----------|-----------|------------|---------|
| NULL       | NA | NA       | 49        | 18252.4970 | NA      |
| chromosome | 13 | 18137.59 | 36        | 114.9054   | 0       |

Code

With a p-value of 0.00e+00, we conclude that there is an effect of the chromosomes on the the percentage of losses (i.e. at least one chromosome has a percentage different from the others).

### 3.2.2.1.3 Test against mean value

Each estimated coefficients is tested against the mean value (0.0714104).

Code

| chr   | statistic   | p.value   | adj_p.value |
|-------|-------------|-----------|-------------|
| chr1  | 8.0729807   | 0.0044930 | 0.0073011   |
| chr3  | 12.7521078  | 0.0003556 | 0.0007705   |
| chr4  | 0.2589817   | 0.6108206 | 0.7325121   |
| chr5  | 0.0000065   | 0.9979586 | 0.9979586   |
| chr6  | 86.8600057  | 0.0000000 | 0.0000000   |
| chr8  | 25.8481370  | 0.0000004 | 0.0000012   |
| chr9  | 0.2461236   | 0.6198179 | 0.7325121   |
| chr11 | 18.7070789  | 0.0000152 | 0.0000396   |
| chr15 | 3.4460598   | 0.0634027 | 0.0915817   |
| chr16 | 0.1298549   | 0.7185825 | 0.7784644   |
| chr17 | 11.9583960  | 0.0005440 | 0.0010103   |
| chr19 | 61.3474444  | 0.0000000 | 0.0000000   |
| chrX  | 138.2108039 | 0.0000000 | 0.0000000   |

### 3.2.2.2 Gains

#### 3.2.2.2.1 Estimated proportions for each chromosome

The following table gives the estimated probability for each chromosome with standard error and confidence interval at 95%.

Code

Code

| chromosome | prob      | SE        | lower     | upper     |
|------------|-----------|-----------|-----------|-----------|
| chr1       | 0.0014430 | 0.0014420 | 0.0002032 | 0.0101688 |
| chr3       | 0.0207980 | 0.0029401 | 0.0157532 | 0.0274133 |
| chr4       | 0.0051967 | 0.0019591 | 0.0024794 | 0.0108596 |
| chr5       | 0.0129179 | 0.0031128 | 0.0080452 | 0.0206803 |
| chr6       | 0.0263550 | 0.0035721 | 0.0201889 | 0.0343385 |
| chr8       | 0.0071713 | 0.0023819 | 0.0037354 | 0.0137240 |



| chromosome | prob      | SE        | lower     | upper     |
|------------|-----------|-----------|-----------|-----------|
| chr9       | 0.0086605 | 0.0022264 | 0.0052277 | 0.0143152 |
| chr11      | 0.0036014 | 0.0014676 | 0.0016189 | 0.0079926 |
| chr15      | 0.0016906 | 0.0011944 | 0.0004229 | 0.0067336 |
| chr16      | 0.0317460 | 0.0040328 | 0.0247258 | 0.0406763 |
| chr17      | 0.0011703 | 0.0008270 | 0.0002927 | 0.0046667 |
| chr19      | 0.0028037 | 0.0011430 | 0.0012601 | 0.0062264 |
| chrX       | 0.0279476 | 0.0048710 | 0.0198306 | 0.0392540 |

Code

Proportion of gain by chromosome

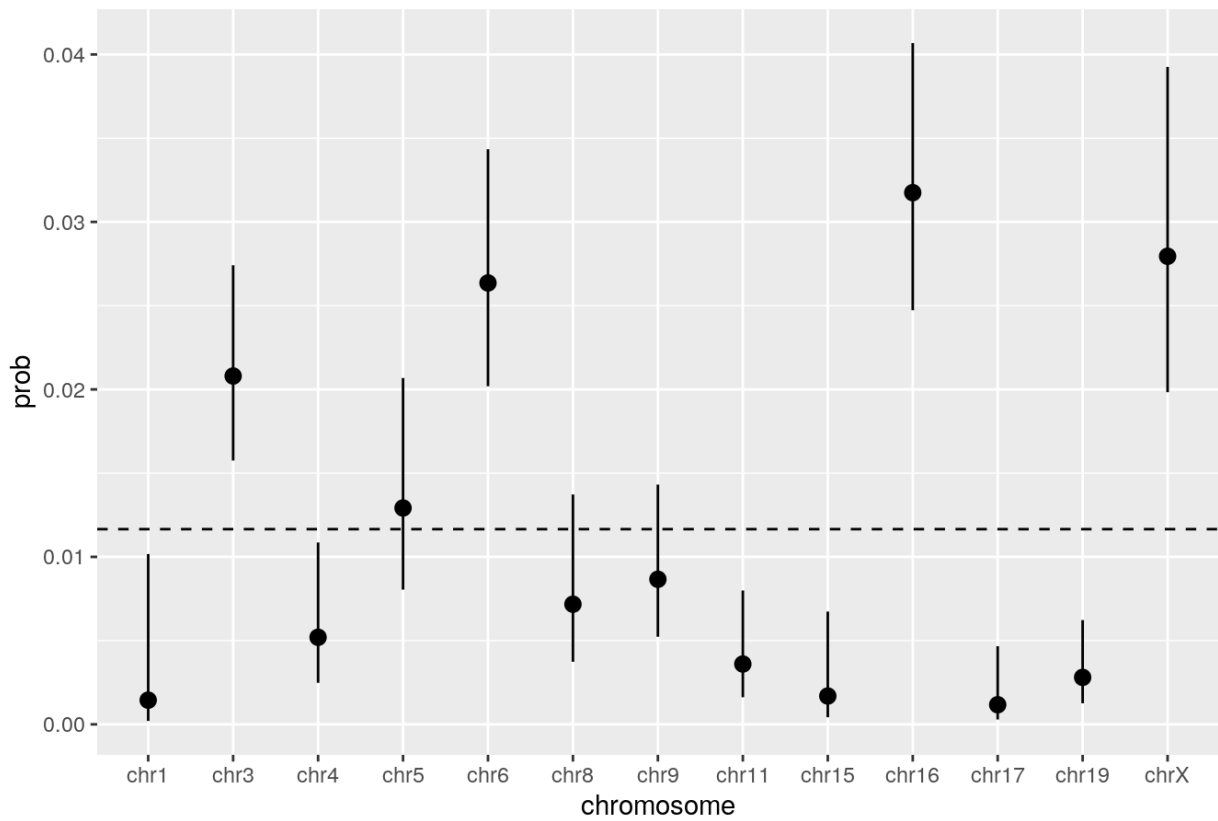

### 3.2.2.2.2 Anova

Anova table on gains model:

Code

| term       | df | Deviance | Resid..Df | Resid..Dev  | p.value |
|------------|----|----------|-----------|-------------|---------|
| NULL       | NA | NA       | 49        | 25853.30692 | NA      |
| chromosome | 13 | 25763.34 | 36        | 89.96192    | 0       |

Code

With a p-value of 0.00e+00, we conclude that there is an effect of the chromosomes on the the percentage of losses (i.e. at least one chromosome has a percentage different from the others).

### 3.2.2.2.3 Test against mean value

Each estimated coefficients is tested against the mean value (0.011654).

Code

| chr   | statistic  | p.value   | adj_p.value |
|-------|------------|-----------|-------------|
| chr1  | 4.4002983  | 0.0359326 | 0.0467124   |
| chr3  | 16.6172801 | 0.0000457 | 0.0001486   |
| chr4  | 4.6155734  | 0.0316829 | 0.0457642   |
| chr5  | 0.1823541  | 0.6693579 | 0.6693579   |
| chr6  | 35.6347262 | 0.0000000 | 0.0000000   |
| chr8  | 2.1461663  | 0.1429264 | 0.1689130   |
| chr9  | 1.3374309  | 0.2474876 | 0.2681115   |
| chr11 | 8.3586519  | 0.0038386 | 0.0071287   |
| chr15 | 7.5190272  | 0.0061051 | 0.0099207   |
| chr16 | 60.7573910 | 0.0000000 | 0.0000000   |
| chr17 | 10.6501980 | 0.0011006 | 0.0023846   |
| chr19 | 12.2968850 | 0.0004537 | 0.0011797   |
| chrX  | 24.7110359 | 0.0000007 | 0.0000029   |

## 3.3 Analysis of NT data only

### 3.3.1 Model

A generalized linear model is fitted between gains or losses fractions and chromosomes with a quasibinomial family and weights of observation equal to number of cells.

Code

### 3.3.2 Results

#### 3.3.2.1 Losses

##### 3.3.2.1.1 Estimated proportions for each chromosome

The following table gives the estimated probability for each chromosome with standard error and confidence interval at 95%.

Code

Code

| chromosome | prob      | SE        | lower     | upper     |
|------------|-----------|-----------|-----------|-----------|
| chr1       | 0.0160226 | 0.0038548 | 0.0099832 | 0.0256211 |
| chr3       | 0.0279931 | 0.0034232 | 0.0220104 | 0.0355429 |
| chr4       | 0.0349170 | 0.0043919 | 0.0272602 | 0.0446257 |
| chr5       | 0.0124224 | 0.0025199 | 0.0083398 | 0.0184662 |
| chr6       | 0.0257048 | 0.0032223 | 0.0200905 | 0.0328355 |
| chr8       | 0.0382022 | 0.0064253 | 0.0274208 | 0.0529919 |
| chr9       | 0.0365169 | 0.0049707 | 0.0279312 | 0.0476123 |
| chr11      | 0.0187683 | 0.0032865 | 0.0133025 | 0.0264199 |
| chr15      | 0.0252672 | 0.0048923 | 0.0172595 | 0.0368511 |
| chr16      | 0.0444096 | 0.0047087 | 0.0360426 | 0.0546089 |
| chr17      | 0.0316319 | 0.0046927 | 0.0236211 | 0.0422419 |
| chr19      | 0.0221551 | 0.0033028 | 0.0165271 | 0.0296418 |
| chrX       | 0.0169492 | 0.0033610 | 0.0114778 | 0.0249629 |

Code

Proportion of loss by chromosome

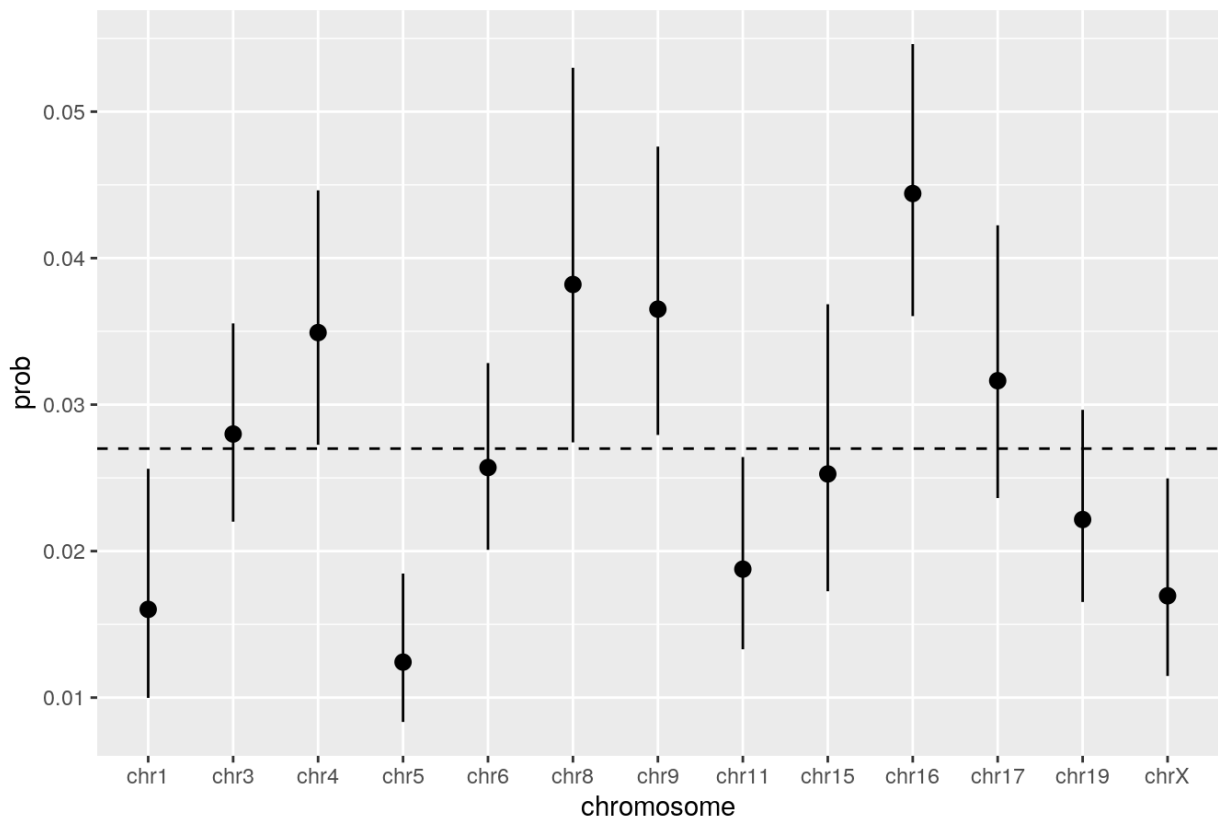

### 3.3.2.1.2 Anova

Anova table on losses model:

Code

| <b>term</b> | <b>df</b> | <b>Deviance</b> | <b>Resid..Df</b> | <b>Resid..Dev</b> | <b>p.value</b> |
|-------------|-----------|-----------------|------------------|-------------------|----------------|
| NULL        | NA        | NA              | 50               | 24442.2009        | NA             |
| chromosome  | 13        | 24323.03        | 37               | 119.1672          | 0              |

Code

With a p-value of 0.00e+00, we conclude that there is an effect of the chromosomes on the the percentage of losses (i.e. at least one chromosome has a percentage different from the others).

### 3.3.2.1.3 Test against mean value

Each estimated coefficients is tested against the mean value (0.0269969).

Code

| <b>chr</b> | <b>statistic</b> | <b>p.value</b> | <b>adj_p.value</b> |
|------------|------------------|----------------|--------------------|
| chr1       | 4.7510280        | 0.0292808      | 0.0677617          |
| chr3       | 0.0877083        | 0.7671110      | 0.7671110          |
| chr4       | 4.1473602        | 0.0416995      | 0.0677617          |
| chr5       | 14.8333531       | 0.0001174      | 0.0007634          |
| chr6       | 0.1532767        | 0.6954235      | 0.7671110          |
| chr8       | 4.2087671        | 0.0402156      | 0.0677617          |
| chr9       | 4.8733626        | 0.0272743      | 0.0677617          |
| chr11      | 4.3445802        | 0.0371269      | 0.0677617          |
| chr15      | 0.1171550        | 0.7321408      | 0.7671110          |
| chr16      | 21.6090867       | 0.0000033      | 0.0000435          |
| chr17      | 1.1350842        | 0.2866935      | 0.3727015          |
| chr19      | 1.7664049        | 0.1838276      | 0.2655288          |
| chrX       | 5.5632399        | 0.0183414      | 0.0677617          |

### 3.3.2.2 Gains

#### 3.3.2.2.1 Estimated proportions for each chromosome

The following table gives the estimated probability for each chromosome with standard error and confidence interval at 95%.

Code

Code

| chromosome | prob      | SE        | lower     | upper     |
|------------|-----------|-----------|-----------|-----------|
| chr1       | 0.0009425 | 0.0009421 | 0.0001327 | 0.0066588 |
| chr3       | 0.0012920 | 0.0007454 | 0.0004168 | 0.0039980 |
| chr4       | 0.0022896 | 0.0011435 | 0.0008596 | 0.0060842 |
| chr5       | 0.0046584 | 0.0015492 | 0.0024256 | 0.0089282 |
| chr6       | 0.0008292 | 0.0005861 | 0.0002074 | 0.0033091 |
| chr8       | 0.0033708 | 0.0019428 | 0.0010876 | 0.0103975 |
| chr9       | 0.0000000 | 0.0000002 | 0.0000000 | 1.0000000 |
| chr11      | 0.0017595 | 0.0010150 | 0.0005676 | 0.0054408 |
| chr15      | 0.0097182 | 0.0030582 | 0.0052367 | 0.0179657 |
| chr16      | 0.0261233 | 0.0036458 | 0.0198533 | 0.0343041 |
| chr17      | 0.0007189 | 0.0007186 | 0.0001013 | 0.0050849 |
| chr19      | 0.0025176 | 0.0011245 | 0.0010483 | 0.0060340 |
| chrX       | 0.0006780 | 0.0006777 | 0.0000955 | 0.0047963 |

Code

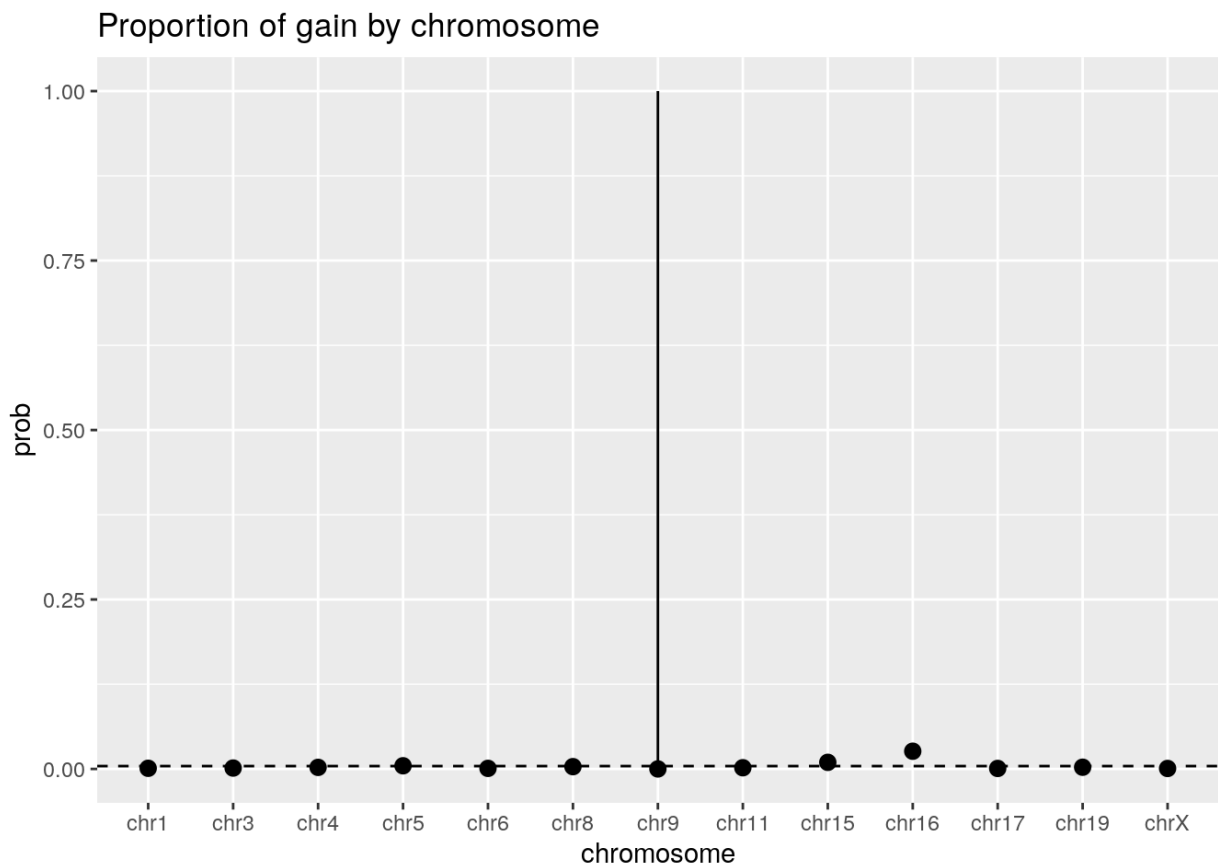

### 3.3.2.2.2 Anova

Anova table on gains model:

Code

| term       | df | Deviance | Resid..Df | Resid..Dev  | p.value |
|------------|----|----------|-----------|-------------|---------|
| NULL       | NA | NA       | 50        | 28547.42270 | NA      |
| chromosome | 13 | 28483.14 | 37        | 64.28078    | 0       |

Code

With a p-value of 0.00e+00, we conclude that there is an effect of the chromosomes on the the percentage of losses (i.e. at least one chromosome has a percentage different from the others).

### 3.3.2.2.3 Test against mean value

Each estimated coefficients is tested against the mean value (0.0042229).

Code

| chr   | statistic   | p.value   | adj_p.value |
|-------|-------------|-----------|-------------|
| chr1  | 2.2569648   | 0.1330145 | 0.2161486   |
| chr3  | 4.2234601   | 0.0398688 | 0.1295735   |
| chr4  | 1.5048880   | 0.2199208 | 0.3176634   |
| chr5  | 0.0870525   | 0.7679583 | 0.8319548   |
| chr6  | 5.3174682   | 0.0211127 | 0.0914882   |
| chr8  | 0.1530317   | 0.6956548 | 0.8221375   |
| chr9  | 0.0001485   | 0.9902760 | 0.9902760   |
| chr11 | 2.3083258   | 0.1286826 | 0.2161486   |
| chr15 | 6.9708675   | 0.0082847 | 0.0538508   |
| chr16 | 165.6721921 | 0.0000000 | 0.0000000   |
| chr17 | 3.1450374   | 0.0761583 | 0.1650096   |
| chr19 | 1.3430169   | 0.2465026 | 0.3204534   |
| chrX  | 3.3566557   | 0.0669339 | 0.1650096   |

## 3.4 Pooled data

Code

### 3.4.1 Model on all data.

Code

Code

| <b>type</b> | <b>chromosome</b> | <b>prob</b> | <b>SE</b> | <b>lower</b> | <b>upper</b> |
|-------------|-------------------|-------------|-----------|--------------|--------------|
| NT          | chr1              | 0.0160226   | 0.0038548 | 0.0099832    | 0.0256211    |
| 48h_IAA     | chr1              | 0.0447330   | 0.0078525 | 0.0316319    | 0.0629079    |
| NT          | chr3              | 0.0292851   | 0.0034990 | 0.0231533    | 0.0369794    |
| 48h_IAA     | chr3              | 0.1112054   | 0.0064770 | 0.0991303    | 0.1245481    |
| NT          | chr4              | 0.0372066   | 0.0045282 | 0.0292807    | 0.0471737    |
| 48h_IAA     | chr4              | 0.0801782   | 0.0073994 | 0.0668213    | 0.0959304    |
| NT          | chr5              | 0.0170807   | 0.0029479 | 0.0121679    | 0.0239292    |
| 48h_IAA     | chr5              | 0.0843465   | 0.0076607 | 0.0704947    | 0.1006255    |
| NT          | chr6              | 0.0265340   | 0.0032725 | 0.0208211    | 0.0337604    |
| 48h_IAA     | chr6              | 0.1521631   | 0.0080095 | 0.1371201    | 0.1685341    |
| NT          | chr8              | 0.0415730   | 0.0066910 | 0.0302667    | 0.0568552    |
| 48h_IAA     | chr8              | 0.0406375   | 0.0055736 | 0.0310149    | 0.0530819    |
| NT          | chr9              | 0.0365169   | 0.0049707 | 0.0279312    | 0.0476123    |
| 48h_IAA     | chr9              | 0.0831409   | 0.0066341 | 0.0710288    | 0.0971025    |
| NT          | chr11             | 0.0205279   | 0.0034340 | 0.0147743    | 0.0284572    |
| 48h_IAA     | chr11             | 0.0474190   | 0.0052070 | 0.0381957    | 0.0587334    |
| NT          | chr15             | 0.0349854   | 0.0057280 | 0.0253391    | 0.0481227    |
| 48h_IAA     | chr15             | 0.0591716   | 0.0068599 | 0.0470732    | 0.0741375    |
| NT          | chr16             | 0.0705329   | 0.0058525 | 0.0598892    | 0.0829015    |
| 48h_IAA     | chr16             | 0.1052910   | 0.0070600 | 0.0922341    | 0.1199520    |
| NT          | chr17             | 0.0330697   | 0.0047946 | 0.0248584    | 0.0438715    |
| 48h_IAA     | chr17             | 0.0509070   | 0.0053171 | 0.0414395    | 0.0623967    |
| NT          | chr19             | 0.0246727   | 0.0034809 | 0.0186957    | 0.0324973    |
| 48h_IAA     | chr19             | 0.0280374   | 0.0035685 | 0.0218293    | 0.0359462    |
| NT          | chrX              | 0.0176271   | 0.0034264 | 0.0120288    | 0.0257629    |

| type    | chromosome | prob      | SE        | lower     | upper     |
|---------|------------|-----------|-----------|-----------|-----------|
| 48h_IAA | chrX       | 0.1921397 | 0.0116432 | 0.1703451 | 0.2159969 |

Code

Proportion of alterations by chromosome

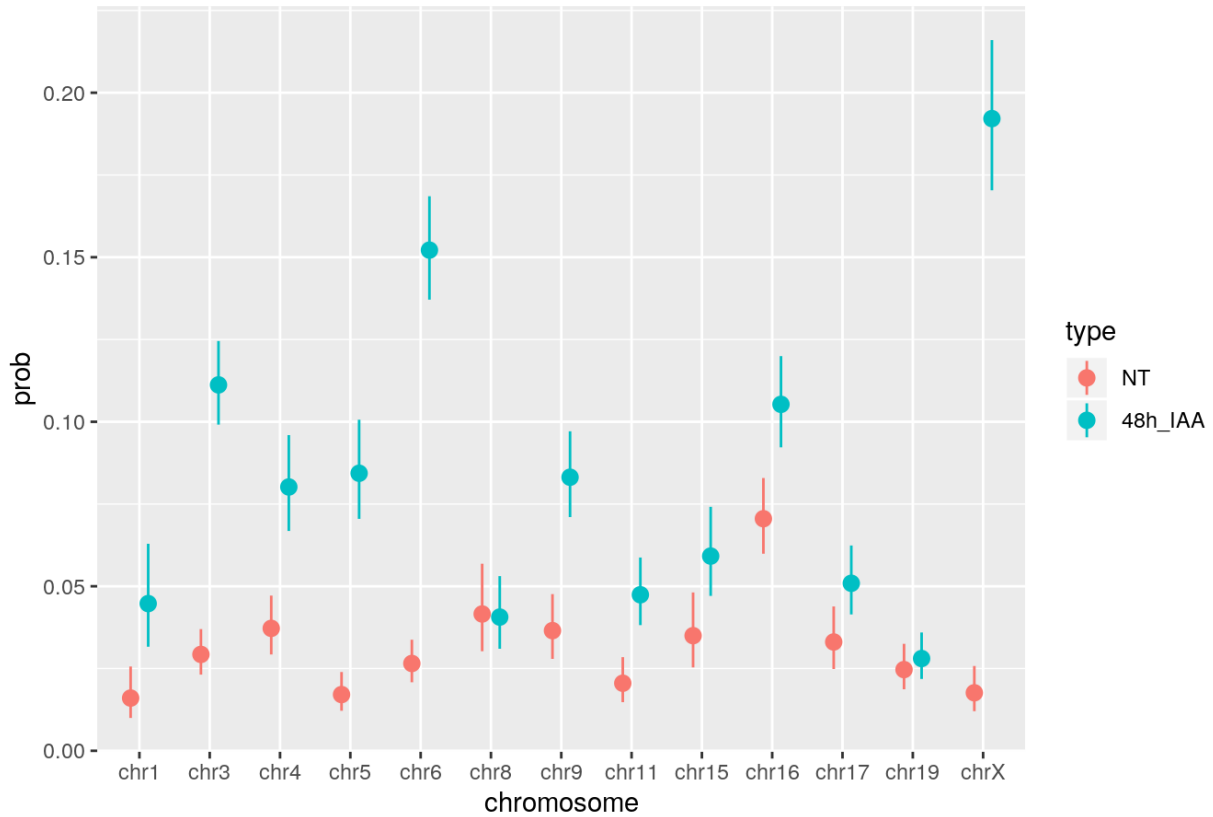

Comparison of missegregation rate for each chromosome between NT and 48h\_IAA

Code

| chr   | statistic   | p.value   | adj_p.value |
|-------|-------------|-----------|-------------|
| chr1  | 11.9275060  | 0.0005531 | 0.0007989   |
| chr3  | 104.0642063 | 0.0000000 | 0.0000000   |
| chr4  | 25.4038759  | 0.0000005 | 0.0000010   |
| chr5  | 68.4016976  | 0.0000000 | 0.0000000   |
| chr6  | 178.4491133 | 0.0000000 | 0.0000000   |
| chr8  | 0.0115849   | 0.9142868 | 0.9142868   |
| chr9  | 27.6394293  | 0.0000001 | 0.0000004   |
| chr11 | 17.6256467  | 0.0000269 | 0.0000499   |
| chr15 | 6.9021942   | 0.0086090 | 0.0111917   |
| chr16 | 14.1698347  | 0.0001670 | 0.0002714   |



| chr   | statistic   | p.value   | adj_p.value |
|-------|-------------|-----------|-------------|
| chr17 | 5.8537380   | 0.0155440 | 0.0183702   |
| chr19 | 0.4527973   | 0.5010095 | 0.5427603   |
| chrX  | 149.1562400 | 0.0000000 | 0.0000000   |

### 3.4.2 Pooled 48h\_ IAA

Code

Code

Code

| chromosome | prob      | SE        | lower     | upper     |
|------------|-----------|-----------|-----------|-----------|
| chr1       | 0.0447330 | 0.0078525 | 0.0316319 | 0.0629079 |
| chr3       | 0.1112054 | 0.0064770 | 0.0991303 | 0.1245481 |
| chr4       | 0.0801782 | 0.0073994 | 0.0668213 | 0.0959304 |
| chr5       | 0.0843465 | 0.0076607 | 0.0704947 | 0.1006255 |
| chr6       | 0.1521631 | 0.0080095 | 0.1371201 | 0.1685341 |
| chr8       | 0.0406375 | 0.0055736 | 0.0310149 | 0.0530819 |
| chr9       | 0.0831409 | 0.0066341 | 0.0710288 | 0.0971025 |
| chr11      | 0.0474190 | 0.0052070 | 0.0381957 | 0.0587334 |
| chr15      | 0.0591716 | 0.0068599 | 0.0470732 | 0.0741375 |
| chr16      | 0.1052910 | 0.0070600 | 0.0922341 | 0.1199520 |
| chr17      | 0.0509070 | 0.0053171 | 0.0414395 | 0.0623967 |
| chr19      | 0.0280374 | 0.0035685 | 0.0218293 | 0.0359462 |
| chrX       | 0.1921397 | 0.0116432 | 0.1703451 | 0.2159969 |

Code

## Proportion of missegregation by chromosome - 48h\_IAA

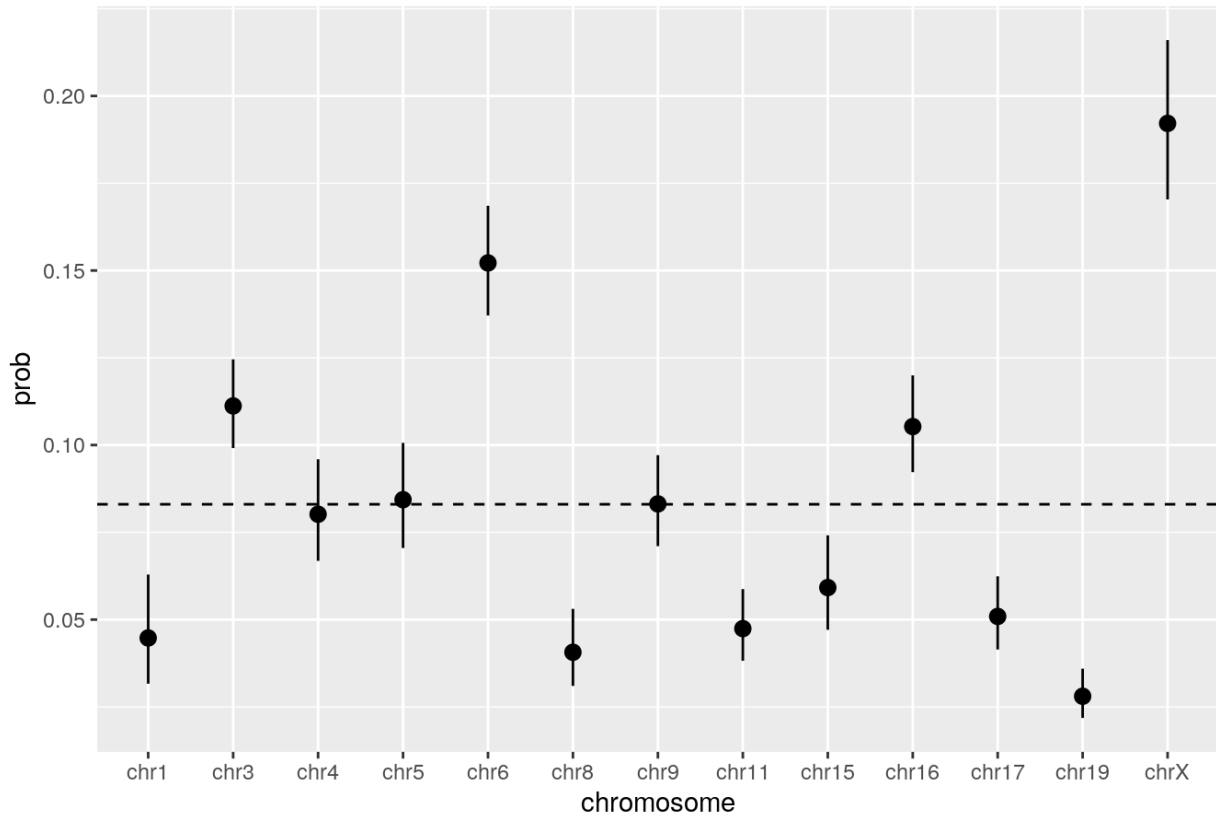

Each estimated coefficients is tested against the mean value (0.0830285).

[Code](#)

| chr   | statistic   | p.value   | adj_p.value |
|-------|-------------|-----------|-------------|
| chr1  | 12.8755390  | 0.0003329 | 0.0005410   |
| chr3  | 24.3555763  | 0.0000008 | 0.0000017   |
| chr4  | 0.1437194   | 0.7046111 | 0.8327222   |
| chr5  | 0.0300268   | 0.8624294 | 0.9342985   |
| chr6  | 121.4355526 | 0.0000000 | 0.0000000   |
| chr8  | 28.2371914  | 0.0000001 | 0.0000003   |
| chr9  | 0.0002874   | 0.9864743 | 0.9864743   |
| chr11 | 26.9345154  | 0.0000002 | 0.0000005   |
| chr15 | 8.7464091   | 0.0031021 | 0.0040328   |
| chr16 | 12.2332706  | 0.0004694 | 0.0006781   |
| chr17 | 22.6387436  | 0.0000020 | 0.0000036   |
| chr19 | 76.3073634  | 0.0000000 | 0.0000000   |
| chrX  | 165.7552473 | 0.0000000 | 0.0000000   |

### 3.4.3 Pooled NT

Code

Code

Code

| <b>chromosome</b> | <b>prob</b> | <b>SE</b> | <b>lower</b> | <b>upper</b> |
|-------------------|-------------|-----------|--------------|--------------|
| chr1              | 0.0160226   | 0.0038548 | 0.0099832    | 0.0256211    |
| chr3              | 0.0292851   | 0.0034990 | 0.0231533    | 0.0369794    |
| chr4              | 0.0372066   | 0.0045282 | 0.0292807    | 0.0471737    |
| chr5              | 0.0170807   | 0.0029479 | 0.0121679    | 0.0239292    |
| chr6              | 0.0265340   | 0.0032725 | 0.0208211    | 0.0337604    |
| chr8              | 0.0415730   | 0.0066910 | 0.0302667    | 0.0568552    |
| chr9              | 0.0365169   | 0.0049707 | 0.0279312    | 0.0476123    |
| chr11             | 0.0205279   | 0.0034340 | 0.0147743    | 0.0284572    |
| chr15             | 0.0349854   | 0.0057280 | 0.0253391    | 0.0481227    |
| chr16             | 0.0705329   | 0.0058525 | 0.0598892    | 0.0829015    |
| chr17             | 0.0330697   | 0.0047946 | 0.0248584    | 0.0438715    |
| chr19             | 0.0246727   | 0.0034809 | 0.0186957    | 0.0324973    |
| chrX              | 0.0176271   | 0.0034264 | 0.0120288    | 0.0257629    |

Code

## Proportion of missegregation by chromosome - NT

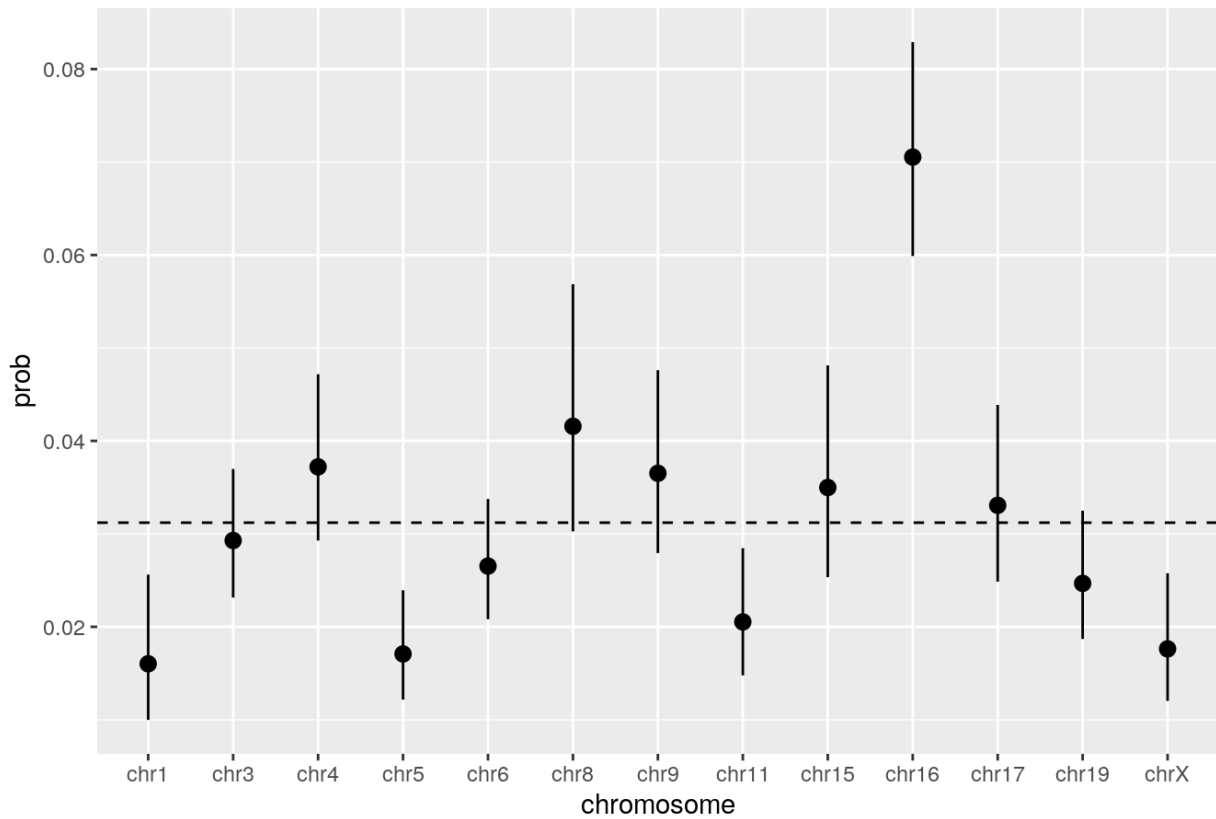

Each estimated coefficients is tested against the mean value (0.0312027).

[Code](#)

| chr   | statistic  | p.value   | adj_p.value |
|-------|------------|-----------|-------------|
| chr1  | 7.7815508  | 0.0052782 | 0.0171543   |
| chr3  | 0.2823494  | 0.5951654 | 0.6447626   |
| chr4  | 2.0775126  | 0.1494836 | 0.2429108   |
| chr5  | 12.3491131 | 0.0004412 | 0.0028678   |
| chr6  | 1.7351314  | 0.1877569 | 0.2712044   |
| chr8  | 3.1430240  | 0.0762523 | 0.1652133   |
| chr9  | 1.3273923  | 0.2492697 | 0.3240506   |
| chr11 | 6.3291988  | 0.0118766 | 0.0308791   |
| chr15 | 0.4865182  | 0.4854846 | 0.5737545   |
| chr16 | 92.1614835 | 0.0000000 | 0.0000000   |
| chr17 | 0.1603574  | 0.6888277 | 0.6888277   |
| chr19 | 2.7878278  | 0.0949829 | 0.1763968   |
| chrX  | 8.7404308  | 0.0031123 | 0.0134867   |
